# Supplementary material for: How patients want to engage with their personal health record: a qualitative study
Source: PubMed Central journal article supplement — BMJ Open. 2013 Jul 29;3(7):e002931. doi: 10.1136/bmjopen-2013-002931 (PMC3731712; doi:10.1136/bmjopen-2013-002931), 2013-07-29
Supplement: bmjopen-2013-002931.draft_revisions.pdf [file bmjopen-2013-002931.draft_revisions.pdf]

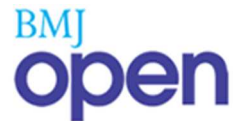

## HOW PATIENTS WANT TO ENGAGE WITH THEIR PERSONAL HEALTH RECORD: A QUALITATIVE STUDY

|                                 |                                                                                                                                                                                                                                                                                                                                                                                                 |
|---------------------------------|-------------------------------------------------------------------------------------------------------------------------------------------------------------------------------------------------------------------------------------------------------------------------------------------------------------------------------------------------------------------------------------------------|
| Journal:                        | <i>BMJ Open</i>                                                                                                                                                                                                                                                                                                                                                                                 |
| Manuscript ID:                  | bmjopen-2013-002931                                                                                                                                                                                                                                                                                                                                                                             |
| Article Type:                   | Research                                                                                                                                                                                                                                                                                                                                                                                        |
| Date Submitted by the Author:   | 27-Mar-2013                                                                                                                                                                                                                                                                                                                                                                                     |
| Complete List of Authors:       | Kerns, John; Shenandoah Valley Family Practice Residency, ; Virginia Commonwealth University, Family Medicine<br>Krist, Alexander; Virginia Commonwealth University, Family Medicine<br>Longo, Daniel; Virginia Commonwealth University, Family Medicine<br>Kuzel, Anton; Virginia Commonwealth University, Family Medicine<br>Woolf, Steven; Virginia Commonwealth University, Family Medicine |
| <b>Primary Subject Heading</b>: | Health informatics                                                                                                                                                                                                                                                                                                                                                                              |
| Secondary Subject Heading:      | General practice / Family practice, Patient-centred medicine, Qualitative research                                                                                                                                                                                                                                                                                                              |
| Keywords:                       | Health informatics < BIOTECHNOLOGY & BIOINFORMATICS, PRIMARY CARE, PREVENTIVE MEDICINE, QUALITATIVE RESEARCH                                                                                                                                                                                                                                                                                    |
|                                 |                                                                                                                                                                                                                                                                                                                                                                                                 |

SCHOLARONE™  
Manuscripts

# HOW PATIENTS WANT TO ENGAGE WITH THEIR PERSONAL HEALTH RECORD: A QUALITATIVE STUDY

## Authors:

Kerns, John<sup>1,2</sup>; Krist, Alexander<sup>1</sup>; Longo, Daniel<sup>1</sup>; Kuzel, Anton<sup>1</sup>; Woolf, Steven<sup>1</sup>

## Affiliations:

1. Shenandoah Valley Family Practice Residency  
140 W 11th Street , Front Royal, Virginia 22630 United States
2. Virginia Commonwealth University - Family Medicine  
POB 980251 , Richmond, Virginia 23298-0251 United States
- 3.

**Keywords:** Health informatics < BIOTECHNOLOGY & BIOINFORMATICS, PRIMARY CARE, PREVENTIVE MEDICINE, QUALITATIVE RESEARCH

**Word Count:** 3072

## ARTICLE SUMMARY

### Article Focus:

What are necessary elements for patient engagement in advanced interactive personal health records (IPHRs)?

### Key Messages:

Engagement in an IPHR is related to integration into current care and the patient-clinician relationship.

Trust in the accuracy, security, and privacy of IPHR information is also linked to the patient-clinician relationship.

Models of technology success and acceptance may warrant modification when applied to primary care use of IPHRs.

### Strengths/Weaknesses:

An advanced IPHR shown to increase use of preventive services was employed for the study.

The sample was drawn from northern Virginia, USA. Other locales may have different IPHR needs and require different strategies to engage patients in IPHR use.

Most participants had ongoing established relationships with their clinician.

## ABSTRACT

**Objective:** To assess factors related to use and non-use of a sophisticated interactive preventive health record (IPHR) designed to promote uptake of 18 recommended clinical preventive services. Personal health records (PHRs) with more advanced functionality may better engage patients and improve health outcomes. However, little is known about how patients want to use or be engaged by such advanced information tools.

**Design:** Descriptive and interpretive qualitative analysis of transcripts and field notes from focus groups of IPHR users and of patients who were invited but did not use the IPHR (non-users).

**Setting:** Primary care patients in eight practices of the Virginia Ambulatory Care Outcomes Research Network (ACORN).

1  
2  
3 Participants: Three focus groups involved a total of 14 IPHR users and 2 groups of non-users totaled 14  
4 participants.  
5

6 Outcomes/Results: For themes identified (relevance, trust, and functionality) participants indicated that  
7 endorsement and use of the IPHR by their personal clinician was vital. In particular, participants'  
8 comments linked IPHR use and the patient-clinician relationship to: 1) integrating the IPHR into current  
9 care, 2) promoting effective patient-clinician encounters and communication, and 3) their confidence in  
10 the accuracy, security and privacy of the information.  
11

12  
13 Conclusion: In addition to patients' stated desires for advanced functionality and information accuracy  
14 and privacy, successful adoption of IPHRs by primary care patients depends on such technology's  
15 relevance, and on its promotion via integration with primary care practices' processes and the patient-  
16 clinician relationship. Accordingly, models of technological success and adoption, when applied to  
17 primary care, may need to include the patient-clinician relationship and practice workflow. These  
18 findings are important for health care providers, the information technology industry, and policymakers  
19 who share an interest in encouraging patients to use PHRs.  
20

21  
22 Trial Registration Clinicaltrials.gov identifier: NCT00589173  
23

24  
25 Funding support: This work was supported by the Agency for Healthcare Research and Quality (R18  
26 HS17046-01).  
27

28  
29 **Key words:** health promotion; information management; informatics; patient-centered care;  
30 physician-patient relations  
31

32  
33 This study was approved by the Institutional Review Board of Virginia Commonwealth University,  
34 Richmond, Virginia, USA.  
35  
36

## 37 38 **BACKGROUND**

39  
40 The concept of patient-centered care is not new to medicine.<sup>1,2</sup> Decades ago, research  
41 demonstrated that engaging patients in their care improves patient satisfaction, quality of care,  
42 and clinical outcomes.<sup>3,4</sup> Recently, national movements aimed at transforming healthcare have  
43 formally defined, incentivized, and institutionalized patient-centered care. The goals of the  
44 Patient-Centered Medical Home espouse these principles.<sup>5,6</sup> State and national legislation  
45 combined with payer initiatives now encourage and support practices to provide patient-  
46 centered care.<sup>7,8</sup> The national *Meaningful Use Roadmap* defines patient and family  
47 engagement from a patient perspective as "actions we must take over time to obtain the  
48  
49  
50  
51  
52  
53  
54  
55  
56  
57  
58  
59  
60

1  
2  
3  
4  
5  
6  
7  
8  
9  
10  
11  
12  
13  
14  
15  
16  
17  
18  
19  
20  
21  
22  
23  
24  
25  
26  
27  
28  
29  
30  
31  
32  
33  
34  
35  
36  
37  
38  
39  
40  
41  
42  
43  
44  
45  
46  
47  
48  
49  
50  
51  
52  
53  
54  
55  
56  
57  
58  
59  
60

greatest benefit from the health care services available to us”, further stating that engagement is both desirable and necessary for health information systems.<sup>5,9,10</sup>

Personal health records (PHRs) are an important resource to help practices provide patient-centered care. Currently, the most common functions performed by PHRs include record keeping, secure messaging, appointment scheduling, and bill payment.<sup>11</sup> Yet, other PHR features could help facilitate patient engagement in their medical care, including use of plain English depictions of clinical data, motivational messages to seek needed care, educational resources, decision aids, and resources and tools to support and guide care.<sup>12,13</sup>

While electronic PHRs have been available for more than a decade, they are used by only a fraction of Americans, and practices struggle to promote patient adoption.<sup>11-21</sup> One possible reason for poor PHR uptake is that many systems are designed solely for use by patients, lacking integration into the care delivery system.<sup>13,15,19</sup> Tang and Lee suggest that patients may prefer PHRs that integrate with the electronic medical records (EMRs) of the patients’ clinicians, thus providing better access to laboratory and other data, as well as communication with the clinician. This, they posit, will facilitate “the type of physician-patient relationship that will improve health.”<sup>17</sup>

Whereas Wen and associates concluded (from national survey data) that optimal PHR promotion should include further study of cultural issues and the doctor-patient relationship,<sup>20</sup> PHR adoption literature is frequently viewed from physician<sup>21,22</sup> or technology-driven<sup>22,23</sup> perspectives, e.g. that increasing the number of EMRs will increase PHR uptake.<sup>21</sup> Similarly, models such as the Model of Information Systems Success,<sup>24</sup> and the Technology Acceptance Model (TAM)<sup>25</sup> have, at times, been applied to healthcare with little patient perspective,<sup>26</sup> or in purposively eschewing “person to person trust” in evaluating such models.<sup>23</sup> However, to our knowledge, no one has evaluated these models in a patient-centered PHR shown to improve patient outcomes.

1  
2  
3 In 2007, we created an interactive preventive health record (IPHR) that was designed with  
4 greater functionality to engage and activate patients in their preventive care. Details about the  
5 design of the IPHR,<sup>27</sup> findings from a randomized controlled trial demonstrating that the IPHR  
6 significantly improved preventive care,<sup>28</sup> and a how-to-guide showing practices how they can  
7 use their PHRs to better promote preventive care, have been previously published.<sup>29</sup> Briefly,  
8 patients use the IPHR to add supplementary information to their EMR record and are then  
9 presented with a prioritized snapshot of the clinical preventive services that are recommended,  
10 based on their individualized risk profile, by the U.S. Preventive Services Task Force and other  
11 reputable guideline panels. The summary is accompanied by personalized explanations of the  
12 information, tailored motivational messages, recommendations and reminders for action, and  
13 decision aids. The information is shared with both patient and clinician.  
14  
15  
16  
17  
18  
19  
20  
21  
22  
23  
24  
25

26 While multiple studies have evaluated why patients use PHRs with more basic functionality,<sup>10,14</sup>  
27 less is known about their interests in and engagement with PHRs with more advanced  
28 functionality as provided by the IPHR. As part of our ongoing trials, we used qualitative  
29 methods to capture perspectives from both “users” and patients who were invited to use the  
30 IPHR but did not use the system (“non-users”), with a lens towards informing the knowledge  
31 gaps and varying viewpoints about PHR adoption noted above. As framed by Kuzel, this inquiry  
32 was “driven not by a need to generalize or predict, but rather by a need to create and test...  
33 interpretations.”<sup>30</sup>  
34  
35  
36  
37  
38  
39  
40  
41  
42

## 43 **METHODS**

### 44 **Design**

45  
46 We employed descriptive and interpretive analysis of focus group transcripts and field notes,  
47 with data reduction via coding and editing for development of major themes and sub-themes. A  
48 trained moderator led the focus groups, using broad-based questions to explore patients’  
49 perspectives about the IPHR and PHRs in general. A focus group guide was used to ensure  
50 consistency of procedures, questions, and discussion topics. The guide and focus group process  
51  
52  
53  
54  
55  
56  
57  
58  
59  
60

1  
2  
3 were based on the methods described by McNamara and by Crabtree and Miller.<sup>31,32</sup> At the  
4 beginning of each patient focus group, participants completed a brief printed questionnaire  
5 eliciting demographic characteristics and information about interactions with their clinician.  
6  
7 The study was approved by the Virginia Commonwealth University Institutional Review Board.  
8  
9

## 10 11 **Sample**

12 All participants were patients from one of eight family medicine practices that were located in  
13 northern Virginia and participated in the Virginia Ambulatory Care Outcomes Research Network  
14 (ACORN). In order to address sampling adequacy, a minimum total of 12 participants in both  
15 user and non-user groups was targeted.<sup>33</sup> During the first four months the IPHR was available to  
16 the practices, 229 of the 2,250 patients randomly selected and mailed an invitation used the  
17 tool (completed registration and entered data on the website). All of these patients were  
18 invited via email to participate in focus groups. Of the 44 who expressed interest, 30 selected to  
19 provide a range of ages, genders, and practice locations were asked to participate in three user  
20 focus groups. (The first user group was rescheduled due to inclement weather and 3 of 10  
21 participants ultimately attended. The next two groups had 5 and 6 of 10 invited participants  
22 attend, respectively.) Of the 2021 non-users, a random sample of 150 patients, stratified by  
23 age, gender, and practice location, were mailed focus group invitations. From the 32 patients  
24 who responded to the letter, 20 selected to provide a range of ages, genders, and practice  
25 locations were asked to participate in two non-user focus groups; 14 attended. Each participant  
26 received a \$50 gift card incentive.  
27  
28  
29  
30  
31  
32  
33  
34  
35  
36  
37  
38  
39  
40  
41  
42

## 43 **Procedures**

44 Focus groups, each approximately 1.5-2 hours in duration, were held at a location near the  
45 participating practices. Group discussion was guided by semi-structured questions with probes  
46 and prompts to provide follow-up lines of inquiry, clarify topics, and stimulate further  
47 discussion. Both user and non-user groups were shown screen-shots demonstrating how the  
48 IPHR worked at appropriate times during the groups so all participants could comment on IPHR  
49 attributes and uses. Sessions were audio-recorded, and the transcriptions of the recordings  
50  
51  
52  
53  
54  
55  
56  
57  
58  
59  
60

6

were then corrected as necessary via comparison to the original recordings. Field notes were also taken to capture aspects of the group interaction that would not be identified on recordings. This included such observations as participant body language and tone, as well as researcher thoughts and reactions.

Transcripts and field notes underwent descriptive analysis with a provisional categorical structure based on focus group question guides. Data were combined with field notes to explore descriptive similarities and differences within and between the groups. Coding and editing of transcripts and field notes were used to derive higher level themes and explanations, and tentative explanations of findings were based on both our data and relevant literature. A four-member team (JWK, AHK, DRL, AJK) performed each step of the analysis independently. Differences in coding, development of themes, and derivation of tentative explanations were discussed by the team until consensus was reached.

## RESULTS

### Study Population

The patients who used the IPHR during the study period were primarily men (56%), white (85%), and more than 50 years old (68%). Of the 50 patients who agreed to participate in focus groups (30 users and 20 non-users), 28 patients attended the sessions, including 14 PHR users and 14 non-users (Table 1). Focus group participants were predominantly women (64%), white (93%), over 50 years old (86%), and all reported having attended at least some college. Nearly all<sup>o</sup> participants rated their health as good to excellent, stated they had been with their clinician at least 3 years, and rated their clinician highly.

**TABLE 1: FOCUS GROUP PARTICIPANTS**

| PARTICIPANT CHARACTERISTICS | 3 PHR User Groups (n=14) | 2 PHR Non-User Groups (n=14) | P value |
|-----------------------------|--------------------------|------------------------------|---------|
| Gender                      | 5 male<br>9 female       | 5 male<br>9 female           | ns      |

<sup>o</sup> The following is used for the verbal annotation of participant percentages: All=100%, nearly all=80-99%, most=60-80%, many=40-60%, a majority= >50%, some=25-40%, few=<25%.



|                                                             |                                                                                     |                                                                                     |      |
|-------------------------------------------------------------|-------------------------------------------------------------------------------------|-------------------------------------------------------------------------------------|------|
| Mean age (years)                                            | 66 (range 50-77)                                                                    | 59 (range 40-75)                                                                    | 0.07 |
| White (%)                                                   | 100                                                                                 | 86                                                                                  | ns   |
| Participant-reported Education, Number of participants      | Some college/associate degree-5<br>College graduate-2<br>More than college degree-7 | Some college/associate degree-2<br>College Graduate-3<br>More than college degree-9 | ns   |
| Participant-reported number of years with current clinician | 2 participants <1 yr<br>4 participants 3-5yrs<br>8 participants >5yrs               | 0 participants <1 yr<br>8 participants 3-5yrs<br>6 participants >5yrs               | ns   |
| Mean participant-reported visits per year                   | 3.6                                                                                 | 3.4                                                                                 | ns   |
| Mean participant quality rating of current clinician        | 9.23/10<br>0=worst doctor possible<br>10=best doctor possible                       | 9.00/10<br>0=worst doctor possible<br>10=best doctor possible                       | ns   |
| Patient-reported health rating, number of participants      | Excellent-4<br>Very Good-6<br>Good-3<br>Fair-0<br>Poor-1                            | Excellent-3<br>Very Good-7<br>Good-3<br>Fair-1<br>Poor-0                            | ns   |

All but one focus group participant acknowledged using the Internet daily, and some described “constant” Internet use for job and personal purposes. Although nearly all stated that they did not use the Internet as often for health-related matters as for other needs, they did report using the Internet to garner health information, primarily for themselves and their family.

### Themes

Across all five focus groups,\* three major themes emerged about how participants wanted to be engaged by PHRs: they wanted (1) novel content that was relevant to their immediate and ongoing care, (2) a PHR they could trust for accuracy, security, and privacy, and (3) a highly functional PHR, facilitating care and communication with their clinician, and providing access to comprehensive personalized information shared with the clinician. Although utility was said to

\* Unless otherwise indicated, findings described herein are from both user and non-user groups.

be essential, a major reason why participants said they trusted, used, and sought relevance in the IPHR was that it was offered to them by their personal clinician.

### Relevance

A few participants noted that upcoming appointments with their clinician made IPHR use more compelling, contributed to their registering, and led them to notice the content pertinent to that visit. Most, however, reported that the invitation for the IPHR was received at a time unassociated with an office visit or any specific healthcare needs. Indeed many participants reported that as a result they did not feel a pressing need to immediately register for and use the IPHR (Table 2). A few non-users declared that they just had not gotten around to registering. Many participants in both the non-user and user groups voiced the opinion that they could access similar information on the internet, and that they did not recognize that IPHR content was personalized to their needs. Some users commented that they had already fully addressed their preventive healthcare needs with their clinician.

**TABLE 2: REPRESENTATIVE PARTICIPANT COMMENTS ON RELEVANCE**

| Sub-themes                       | Representative Quotations                                                                                                                                                                                                                                                                                                                                                                                                                                                                                                |
|----------------------------------|--------------------------------------------------------------------------------------------------------------------------------------------------------------------------------------------------------------------------------------------------------------------------------------------------------------------------------------------------------------------------------------------------------------------------------------------------------------------------------------------------------------------------|
| <b>Lacking Urgency</b>           | <i>It was procrastination. It wasn't that I wasn't going to do it.</i><br><br><i>I said, "Boy, this would be -- this is interesting, I should try it." Stuck it in a pile and forgot about it.</i>                                                                                                                                                                                                                                                                                                                       |
| <b>Lacking Novelty</b>           | <i>Particularly when it concerns a medical something, I usually look it up, you know, any of the various websites that you can go to.</i><br><br><i>I am the health related expert in the house. And I have to know what everything is. So yes I go to the Cleveland Clinic and the Mayo Clinic and Johns Hopkins.</i><br><br><i>United Healthcare has a preventive section to it. You know it's got your records, and then there's hey if you've got a problem, you go to this section and it seemed to cover more.</i> |
| <b>Redundant to current care</b> | <i>It was not, in my case not new information since my doctor and I had talked about it so much...</i><br><br><i>She knows what I do for exercise, and she asks me questions when I go in, you know. But, if I didn't have that kind of relationship, then I think I would -- I mean, right now, I don't see, for me, that I need this.</i>                                                                                                                                                                              |

### Trust

Nearly all participants vigorously discussed three components of trust necessary for them to use a PHR: security (protecting their health information), privacy (not sharing their health information with others), and accuracy (ensuring that the clinical content and health

recommendations proffered by the system were correct and appropriate for them) (Table 3). Most participants reported trusting the IPHR because it was recommended and used by their clinician's practice. A few participants in the non-user groups indicated discomfort with having any of their personal health information on the Internet. However, most participants in all groups expressed the view that clinician endorsement of the IPHR was an indication that their personal health data were secure. Most participants also expressed strong opposition to PHRs developed by commercial entities and to sharing their health information with their insurance company due to the risk of future denial of coverage.

**TABLE 3: REPRESENTATIVE PARTICIPANT COMMENTS ON TRUST**

| Sub-themes      | Representative Quotations                                                                                                                                                                                                                                                                                                                                                                                                                                                                                                                                                                                                                                                                                                  |
|-----------------|----------------------------------------------------------------------------------------------------------------------------------------------------------------------------------------------------------------------------------------------------------------------------------------------------------------------------------------------------------------------------------------------------------------------------------------------------------------------------------------------------------------------------------------------------------------------------------------------------------------------------------------------------------------------------------------------------------------------------|
| <b>Security</b> | <p><i>It came through our own doctor; I didn't have any problem with it. If it had just been out of the blue I might have.</i></p> <p><i>At first I was curious as to what is this, but then I guess I trusted it because it was [clinician's office] which I trusted.</i></p> <p><i>I've come to trust him to keep my information in his laptop...you have to trust the doctor.</i></p>                                                                                                                                                                                                                                                                                                                                   |
| <b>Privacy</b>  | <p><i>I think personally I would only trust what I was affiliated with. What should be familiar with me. I mean, Google certainly doesn't know me...</i></p> <p><i>Another Participant: Oh, Yes they do.</i></p> <p><i>The information you have on the system, passing data maybe to insurance companies and then turn around later and say no we're not going to insure you...</i></p> <p><i>I got scared...because I got the impression that I was going to discuss things of my personal nature with my doctor on the website and I didn't like that, and so I discarded it because I'd rather talk about my health face to face with my doctor.</i></p>                                                                |
| <b>Accuracy</b> | <p><i>There's so many sites out there that you wonder how valid. I felt good that [the clinician's office was] endorsing or leading me to a particular site that they must feel confident in the information and the content..</i></p> <p><i>One reason I don't do (Internet health information) a whole lot is because you get conflicting views and I don't know who to believe and who not to believe. So I...ask my doctor.</i></p> <p><i>I was getting emotionally distraught over those things that I was reading (on the Internet) and then, come to find out, I didn't even have to be concerned about it. But... I got to leave those kinds of things to the doctor because that's what he's trained for.</i></p> |

Nearly all participants reported having had difficulties distinguishing between accurate and inaccurate health information on the internet (Table 3). A few participants gave examples of

10

erroneous health information that caused anxiety or led to poor personal health choices. Most participants stated that they asked their clinician to verify information they found on the web. Nearly all participants reported that they would trust the accuracy of the content and recommendations made by the IPHR because it was endorsed and used by their clinician, and identified their clinician as their primary authority on the accuracy and application of healthcare information.

### Functionality

Functions that the participants identified as important involved two subthemes: enhanced patient-clinician communication and patient-centered utility (Table 4).

**TABLE 4: REPRESENTATIVE PARTICIPANT COMMENTS ON FUNCTIONALITY**

#### Enhanced Patient-Clinician Communication

| Sub-themes                      | Representative Quotations                                                                                                                                                                                                                                                                                                                                                                                                                                                                                                                                                                                                         |
|---------------------------------|-----------------------------------------------------------------------------------------------------------------------------------------------------------------------------------------------------------------------------------------------------------------------------------------------------------------------------------------------------------------------------------------------------------------------------------------------------------------------------------------------------------------------------------------------------------------------------------------------------------------------------------|
| <b>Interactive</b>              | <p><i>Direct communications between the doctor and the patient that you can access via the Internet just like medical records, you should be able to access that.</i></p> <p><i>The nurse called me up and said we haven't seen you in so long, you know, and she starts going through this (prevention) stuff...I said well I've been going to my heart doctor...and she said, you should come back you know.</i></p> <p><i>Not dictating, but cooperating, supportive, and provide me the source of the information, let me go there and look at the thing before, you know we make a decision.</i></p>                         |
| <b>Focus Discussion</b>         | <p><i>I have 15 minutes to talk to him. And this gives me the ability to list everything that's wrong with me...This is what you need to talk to the doctor about in your physical.</i></p> <p><i>I would think anything that would focus my discussion would hopefully focus his as well.</i></p> <p><i>When I go in to the primary care physician, I don't want to just listen to him. I do want to hear what he has to say, but I want to be able to ask what I think are intelligent questions. I'll go do research on that. And then I feel like I can have a better, more productive discussion with the physician.</i></p> |
| <b>Broaden Discussion</b>       | <p><i>What if your doctor disagrees somewhat with the United States Preventive Services Task Force?...It becomes a discussion point.</i></p> <p><i>I think it (conversation with clinician) might be a little bit broader. You go and say, "Here's what I'm seeing or here's what going on with my family."</i></p>                                                                                                                                                                                                                                                                                                               |
| <b>Efficiency Pros and Cons</b> | <p><i>There might be an opportunity to take some of the minor issues off the table, so when you go to the doctor it would shorten the amount of things that you would like to talk to him about because you've answered some of that already.</i></p> <p><i>That email to the doctor, I think, could create a problem. It's very time consuming. You spend all day on the internet answering mail, the doctor will never get paid...SECOND PARTICIPANT: You'd never</i></p>                                                                                                                                                       |

|  |                                                                                                                                                                                                                                 |
|--|---------------------------------------------------------------------------------------------------------------------------------------------------------------------------------------------------------------------------------|
|  | <p><i>get your tetanus shot. FIRST PARTICIPANT: ..You'd never get anything else.</i></p> <p><i>So what is this doing for the physician? I mean, we're keeping healthier, but it means a lot more work for him in a way.</i></p> |
|--|---------------------------------------------------------------------------------------------------------------------------------------------------------------------------------------------------------------------------------|

**PATIENT-CENTERED UTILITY**

| Subthemes                                             | Representative Quotations                                                                                                                                                                                                                                                                                                                                                                                                                                                                                                                                                                                                                                                                                                                                                                                                                                                                                                                                                                                                          |
|-------------------------------------------------------|------------------------------------------------------------------------------------------------------------------------------------------------------------------------------------------------------------------------------------------------------------------------------------------------------------------------------------------------------------------------------------------------------------------------------------------------------------------------------------------------------------------------------------------------------------------------------------------------------------------------------------------------------------------------------------------------------------------------------------------------------------------------------------------------------------------------------------------------------------------------------------------------------------------------------------------------------------------------------------------------------------------------------------|
| <b>Expand Access To Personal Clinical Information</b> | <p><i>It's not just security, but also access. My access to my personal information. I want to have that, and electronic medical records, Internet-based systems can provide me with that.. I trust my physician here because I've developed a relationship with him, but anybody else, I would want to have absolute access to my information.</i></p>                                                                                                                                                                                                                                                                                                                                                                                                                                                                                                                                                                                                                                                                            |
| <b>Align Patient-Clinician Information</b>            | <p><i>Knowing that all the information is correct to the best of your knowledge, and in one place where it can be accessed by the doctor and by you, it makes me feel very secure.</i></p> <p><i>This information is shared with your physician -- as you update things your provider is going to be made aware of this you know-We need to be on the same page.</i></p>                                                                                                                                                                                                                                                                                                                                                                                                                                                                                                                                                                                                                                                           |
| <b>Provide Personalized Information</b>               | <p><i>I think with that information available, I think it will actually help him a great deal to change my lifestyle. I think that's what all this preventive medicine is all about is how you change your lifestyle.</i></p> <p><i>It also gave me some thoughts about the preventive things I should need to know or that I should be thinking about. So it made me think about, gosh I'll have to ask her. For example, something about an aspirin a day, is it something that's appropriate for me?</i></p> <p><i>There was lots of information there but it was not, in my case not new information since my doctor and I had talked about it so much...</i></p>                                                                                                                                                                                                                                                                                                                                                              |
| <b>Comprehensively Address Patient Needs</b>          | <p><i>I'm surprised that this isn't something for medications. One doctor says you got to take calcium and another one says you got to take multivitamin and another one says you got to take an aspirin, and people may be taking allergy medicines that they get over the counter...</i></p> <p><i>Some general thing about menopause or some of the women's issues would have been helpful. Age specific things might be helpful, children, you know, developmental or something like that just as a good reference for parents.</i></p> <p><i>Say you had in your history that you had a history of stroke or cancer, would it also give patient education stuff, like here's a link to the American Cancer Society? Or here's a thing for support group information? I'm a surviving cancer patient...</i></p> <p><i>Here's what we want: we're living here but we want to occasionally go somewhere else. Anyone in the country should be able to open and keep track of it accurately...realistically and securely.</i></p> |

Many participants stated that they wanted PHRs to enhance communication with their clinician. Several liked being contacted about preventive care after they used the IPHR. Participants described how the IPHR could focus discussions during office visits, making their visits more productive. Conversely, several also mentioned that the IPHR could appropriately

1  
2  
3 broaden discussions for some topics, such as identifying preventive screening choices that they  
4 or their clinician viewed as warranting dialogue, or starting conversations about lifestyle  
5 changes. However, some participants expressed concern that more time would be required for  
6 busy clinicians and patients to use the IPHR or similar tools. Participants worried about  
7 increased fees for either patients or practices to use similar PHRs in the future.  
8  
9  
10  
11  
12

13  
14 Many participants said that a critically important feature of the IPHR was the ability for patients  
15 to access their personal health information. They explained that this access was important so  
16 that they could be “on the same page” as their clinician. They also commented that shared  
17 access to information would contribute to improved accuracy of records and more productive  
18 interactions.  
19  
20  
21  
22  
23

24  
25 Many participants identified the personalized advice offered by the IPHR, its prompts to discuss  
26 its recommendations with the clinician (e.g. whether to take aspirin), and its ability to prioritize  
27 recommendations and thereby highlight critical or information to act on, as very important.  
28 Also of interest to many was adding features for comprehensive medication reconciliation, in-  
29 depth information for the whole family for prevention as well as for specific diseases, and links  
30 to local resources that provide support and information for lifestyle changes, preventive care  
31 needs, and chronic diseases. Moreover, several participants stated that PHRs, such as the IPHR,  
32 should be shared seamlessly across all healthcare providers and settings.  
33  
34  
35  
36  
37  
38  
39  
40  
41  
42

## 43 **DISCUSSION**

44 Given the national investment of \$27 billion to promote the adoption, implementation, and  
45 meaningful use of health information technology,<sup>34-36</sup> it is essential to understand how to better  
46 engage patients in using technology if it is to achieve its full potential. Many Americans have  
47 not embraced the use of PHRs,<sup>37</sup> but our findings underscore the general interest of patients in  
48 using such tools if certain attributes are offered. Specifically, users and non-users alike  
49 suggested that engagement was more likely if the PHR seemed relevant to their care, if they  
50 could trust the system, and if it offered functions that could help them manage their health.  
51  
52  
53  
54  
55  
56  
57

58 13  
59  
60

1  
2  
3  
4  
5 Relevance may seem obvious and implied to clinicians and PHR developers, but this may be less  
6 apparent to busy patients who view themselves as already capable of finding healthcare  
7 information and managing their healthcare. When PHR use is integrated into care so that it  
8 improves the efficiency and quality of their care (e.g. timely use related to clinician visits), its  
9 relevance becomes more transparent. The PHR becomes a welcome extension of interactions  
10 with the clinician and the related healthcare team.  
11  
12  
13  
14  
15  
16  
17

18 Users also identified trust as an important prerequisite to using a PHR. National surveys have  
19 clearly documented a level of public concern about personal health information existing on the  
20 web and about employers, insurers, or even commercial entities being able to access or misuse  
21 such information.<sup>37</sup> Although such fears may ease over time as more private information  
22 migrates into the cyber-environment, this reticence may have contributed to the failure of  
23 some commercial PHRs to gain wide acceptance by the general public.<sup>38</sup> Our study participants  
24 also identified the need to trust the accuracy of the information in the PHR. Unfortunately, the  
25 data in many health information systems are commonly incorrect or outdated, often focused  
26 more on billing for service delivery than on conveying useful information to patients,  
27 particularly if the information is obtained from insurance claims databases or hospital  
28 systems.<sup>39,40</sup>  
29  
30  
31  
32  
33  
34  
35  
36  
37  
38  
39  
40

41 The addition of certain PHR features that seem popular with patients, such as displaying test  
42 results or supporting asynchronous communication via secure messaging, has generated only  
43 modest increases in actual PHR utilization.<sup>15,19</sup> One explanation is that patients who are  
44 accustomed to more powerful information tools in other aspects of life may expect greater  
45 functionality than merely seeing their information.<sup>41,42</sup> Indeed, participants in this study wanted  
46 much more – including links to personalized recommendations, and resources and tools to help  
47 make information actionable to improve health. As discussed elsewhere, the ability to use  
48 health information technology to take action is an important requirement to making technology  
49 truly patient-centered.<sup>12,13</sup>  
50  
51  
52  
53  
54  
55  
56  
57

58 14  
59  
60

1  
2  
3  
4  
5 Across both users and non-users, nearly all participants reported being more likely to perceive a  
6 PHR as relevant, trustworthy, and functional if it was offered to them by their personal clinician.  
7  
8 We conclude that a key element of engaging patients to use a PHR extends beyond the tool's  
9 design and includes how it is presented to patients and integrated into their care experience.  
10  
11 These concepts are depicted in Figure 1. Overcoming the hurdles for engaging patients begins  
12 with making PHR use routine and related to current needs. Clinician endorsement can generate  
13 patient trust to begin using the PHR. Ultimately, effective PHR use can lead to engaged and  
14 motivated patients, more efficient healthcare delivery, even improved healthcare  
15 outcomes,<sup>27,29</sup> e.g. as already demonstrated by this IPHR.<sup>28</sup>  
16  
17  
18  
19  
20  
21  
22  
23  
24  
25  
26  
27  
28  
29  
30  
31  
32  
33  
34  
35  
36  
37  
38  
39  
40  
41  
42  
43  
44  
45  
46  
47  
48  
49  
50  
51  
52  
53  
54  
55  
56  
57  
58  
59  
60



FIGURE 1: PERSONAL HEALTH RECORD (PHR) FEATURES NEEDED TO ENGAGE PATIENTS

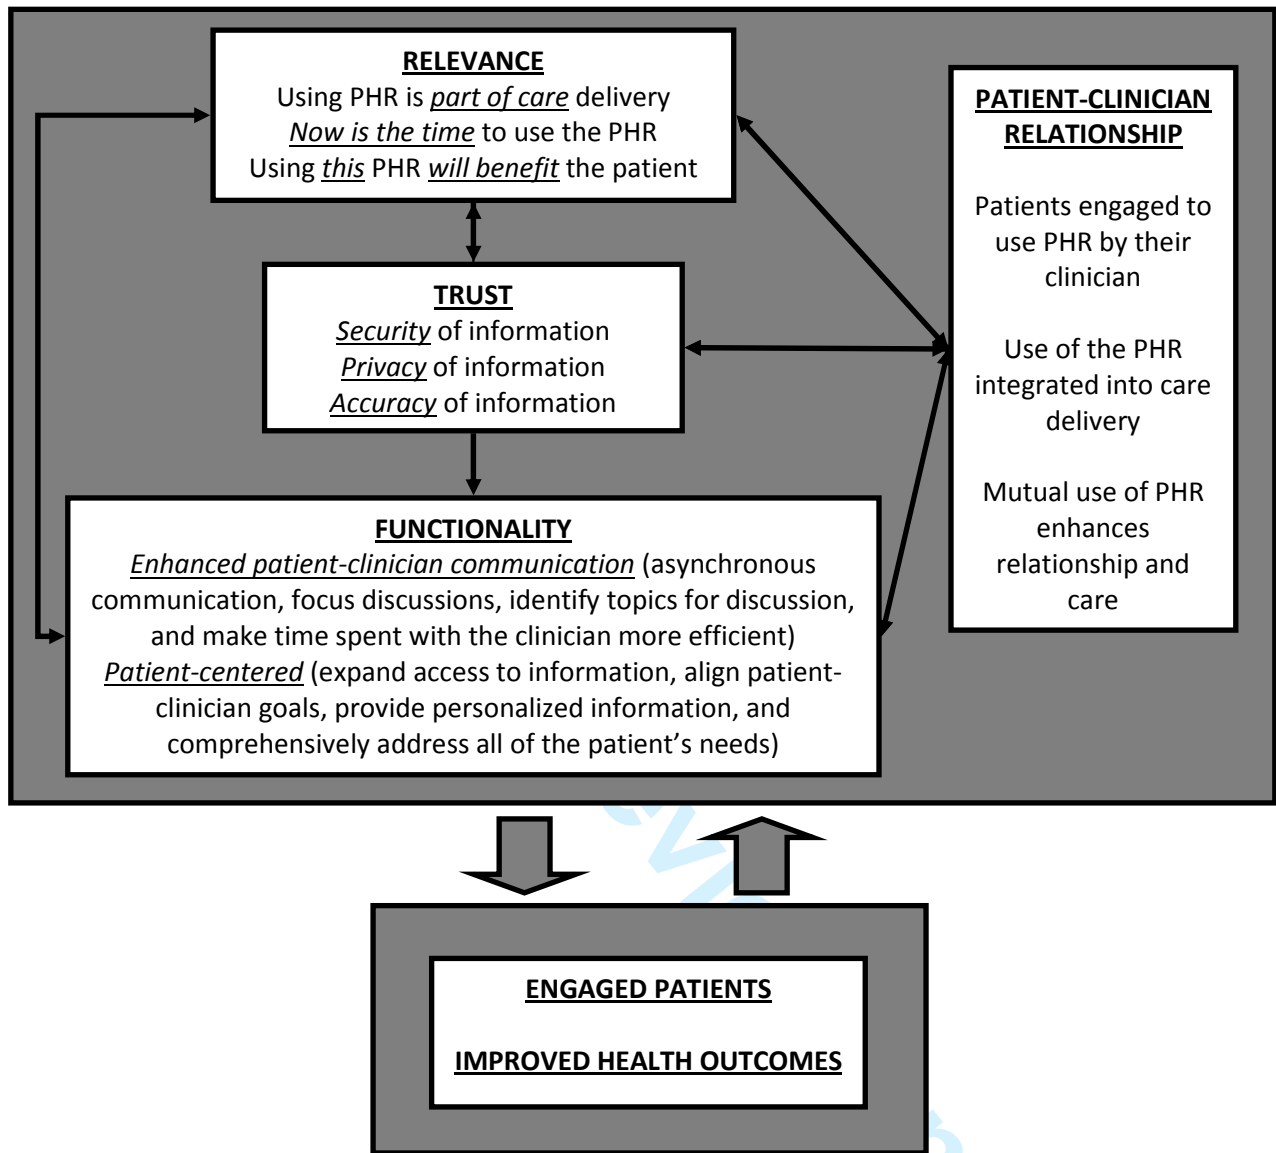

Figure 1 is similar in some regards to the Technology Acceptance Model (TAM), Figure 2.<sup>25</sup> Although many modifications have already been proposed for the TAM,<sup>26,43,44</sup> based on our findings this figure may more accurately portray the relationships needed for patient engagement for primary care IPHRs.

Figure 2: Technology Acceptance Model<sup>25</sup>

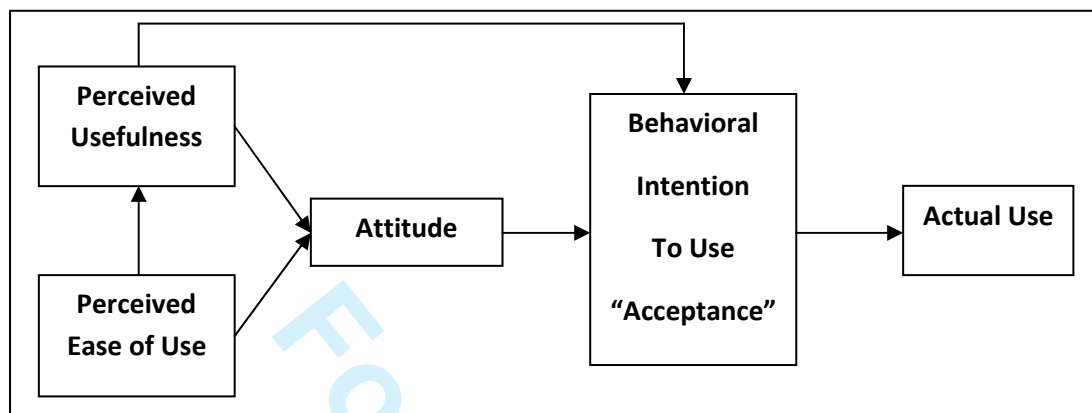

Our study has several important limitations. First, while we attempted to assemble focus groups with a representative range of ages and genders, we may have introduced a selection bias in our sample. Participants were older, more likely to be female, mostly white, and more educated than the overall user and non-user populations.<sup>45,46</sup> However, women are more likely than men to use PHRs<sup>47</sup> and to make healthcare decisions for families.<sup>47-49</sup> Other studies indicate that members of different socioeconomic and racial-ethnic groups may have different PHR preferences (e.g. a PHR not based on the Internet) and may require assistance in using a PHR.<sup>50-52</sup> Second, the sample was drawn entirely from eight practices in northern Virginia. Other locales may have different PHR needs requiring different strategies to engage patients in PHR use. Third, all participants were recruited from family medicine offices that already offered a PHR to patients, and most participants had established relationships with their clinician. Accordingly, participants may have emphasized the value of the patient-clinician relationship in PHR use more than populations from other settings. Lastly, whereas the number of participants (28) will not quantitatively generalize to all IPHR users, the nature of qualitative research is often that of looking at specific cases, many times in order to inform the gaps generated by other data, rather than to compete with or duplicate that information.<sup>32</sup>

## CONCLUSION:

1  
2  
3 To engage primary care patients with an IPHR, this study identifies the importance of relevance,  
4 trust and functionality, all integrated with office processes and the patient-clinician  
5 relationship. In addition to suggesting possible modifications to established models of  
6 technological acceptance, these findings have relevance for healthcare providers, the  
7 information technology industry, and policymakers who share an interest in encouraging  
8 patients to use personal health records or other information tools. Studies like ours should be  
9 expanded and replicated in other settings to more fully understand how to make such  
10 technology more useful to patients.  
11  
12  
13  
14  
15  
16  
17  
18  
19

20 **Acknowledgments:** The authors thank the participating study practices: Fairfax Family Practice,  
21 Gainesville Family Medicine, Herndon Family Medicine, Lorton Station Family Medicine, Prince  
22 William Family Medicine, South Riding Family Medicine, Town Center Family Medicine, and  
23 Vienna Family Medicine. We received invaluable advice and assistance with the focus groups  
24 from Christine C. Kerns, RN, and in designing the project from Stephen F. Rothemich MD, MS. as  
25 well as Kristin Schmidt in project assistance.  
26  
27  
28

29 **Conflicts of interest:** Virginia Commonwealth University holds the intellectual property rights to  
30 the interactive preventive care record evaluated in this study. Although the university and  
31 developers are entitled to the system's revenue, MyPreventiveCare is a noncommercial  
32 product, and no revenues have been generated other than grant funding.  
33  
34

35 **Contributorship:** J. William Kerns, MD –Design, data acquisition, data analysis/interpretation,  
36 drafting/critical revision, and final approval.  
37 Alex H. Krist MD, MPH-Conceptualization, design, data analysis/interpretation, critical revision, and final  
38 approval.  
39 Daniel R. Longo, ScD.- Design, data analysis, critical revision, and final approval.  
40 Anton J. Kuzel, MD, MHPE- Design, data acquisition, data analysis/interpretation, critical revision, and  
41 final approval.  
42 Steven H. Woolf, MD, MPH- Conceptualization, data analysis/interpretation, critical revision, and final  
43 approval  
44  
45  
46

47 **Data sharing:** Transcripts for the focus groups in this study are not able to be shared due to  
48 requirements of our Institutional Review Board.  
49

50 **Funding:** Agency for Healthcare Research and Quality  
51  
52  
53  
54  
55  
56  
57  
58  
59  
60

## REFERENCES

1. Stewart M, Brown JB, Weston WW, McWhinney IR, McWilliam CL, Freeman TR. *Patient-Centered Medicine: Transforming the Clinical Method*. Thousand Oaks, CA: Sage Publications, Inc.; 1995.
2. Stewart M. Towards a global definition of patient centred care. *Bmj*. Feb 24 2001;322(7284):444-445.
3. Greenfield S, Kaplan S, Ware JE Jr. Expanding patient involvement in care. Effects on patient outcomes. *Ann Intern Med* 1985;102(4): 520-8.
4. Kaplan SH, Greenfield S, Ware JE Jr. Assessing the effects of physician-patient interactions on the outcomes of chronic disease. *Med Care* 1989; 27(3):S110-S127.
5. Joint Principles of the Patient-Centered Medical Home. *American Academy of Family Physicians, American Academy of Pediatrics, American Osteopathic Association*. Available at: <http://www.pcpcc.net/>. Accessed Oct, 2011.
6. NCQA - Measuring Quality. Improving Health Care. *National Committee for Quality Assurance*. Available at: <http://www.ncqa.org>. Accessed October, 2011.
7. The Patient Protection and Affordable Care Act. Section 4103. *Public Law 111-148*. 2nd Session ed; 2010.
8. Bielaszka-DuVernay C, Soll RF, Kantak AD, et al. Vermont's Blueprint for medical homes, community health teams, and better health at lower cost Evaluating the medical evidence for quality improvement Management of high-order multiple births: application of lessons learned because of participation in Vermont Oxford Network collaboratives. *Health Aff (Millwood)*. Mar Nov 2006;30(3):383-386.
9. Blumenthal D, Tavenner M. The "meaningful use" regulation for electronic health records. *N Engl J Med*. Aug 5 2010;363(6):501-504.
10. Health IT. *The Office of the National Coordinator for Health Information Technology. U.S. Department of Health & Human Services*. Available at: <http://healthit.hhs.gov>. Accessed July, 2011.
11. Hing E, Burt CW. Office-based medical practices: methods and estimates from the national ambulatory medical care survey. *Adv Data*. Mar 12 2007(383):1-15.
12. Krist AH, Woolf SH. A vision for patient-centered health information systems. *JAMA*. 2011;305(3):300-301.
13. Wang CJ, Huang JT. Integrating technology into healthcare: what will it take? *JAMA* 2012; 307(6): 569-570.
14. Internet usage over time. *Pew Internet and American Life*. Available at: <http://www.pewinternet.org/>. Accessed Oct, 2011.
15. Silvestre AL, Sue VM, Allen JY. If you build it, will they come? The Kaiser Permanente model of online health care. *Health Aff (Millwood)*. Mar-Apr 2009;28(2):334-344.
16. Ralston JD, Coleman K, Reid RJ, Handley MR, Larson EB. Patient experience should be part of meaningful-use criteria. *Health Aff (Millwood)*. Apr 2010;29(4):607-613.
17. Tang PC, Lee TH. Your doctor's office or the Internet? Two paths to personal health records. *N Engl J Med*. Mar 26 2009;360(13):1276-1278.
18. CAHPS Clinician & Group Survey. *Agency for Healthcare Research and Quality*. Available at: [https://www.cahps.ahrq.gov/content/products/CG/PROD\\_CG\\_CG40Products.asp?p=1021&s=213](https://www.cahps.ahrq.gov/content/products/CG/PROD_CG_CG40Products.asp?p=1021&s=213). Accessed Sept, 2011.
19. Dickinson WP, et. al. Use of a Website to Accomplish Health Behavior Change: If You Build It, Will They Come? And Will It Work If They Do? *J Am Board Fam Med* 2013;26:168-176.

19

- 1  
2  
3  
4  
5  
6  
7  
8  
9  
10  
11  
12  
13  
14  
15  
16  
17  
18  
19  
20  
21  
22  
23  
24  
25  
26  
27  
28  
29  
30  
31  
32  
33  
34  
35  
36  
37  
38  
39  
40  
41  
42  
43  
44  
45  
46  
47  
48  
49  
50  
51  
52  
53  
54  
55  
56  
57  
58  
59  
60
20. Wen KY, Kreps G, Zhu F, Miller S. Consumers' perceptions about and use of the internet for personal health records and health information exchange: analysis of the 2007 Health Information National Trends Survey. *J Med Internet Res*. 2010 Dec 18;12(4):e73.
  21. Archer N, Fevrier-Thomas U, Lokker C, McKibbin KA, Straus SE. Personal health records: a scoping review. *J Am Med Inform Assoc* 2011;18:515e522.
  22. Forsythe DE. New bottles, old wine. Hidden cultural assumptions in a computerized explanation system for migraine sufferers. *Med Anthro Quart* 1996;10:551-74.
  23. McKnight DH, Carter M, Thatcher JB, and Clay PF. Trust in a Specific Technology: An Investigation of its Components and Measures. *ACM Transactions on Management Information Systems*. 2(2): 1-15.
  24. DeLone WH and McLean ER. The DeLone and McLean Model of Information Systems Success: A Ten-Year Update. *J Management Information Systems* 2003;19:9-30.
  25. Davis FD. Perceived usefulness, perceived ease of use, and user acceptance of information technology. *MIS Q* 1989;13:319-39.
  26. Moores TT. Towards an integrated model of IT acceptance in healthcare. *Decision Support Systems* 53 (2012) 507-516.
  27. Krist AH, Peele E, Woolf SH, et al. Designing a patient-centered personal health record to promote preventive care. *BMC Med Inform Decis Mak*. 2011;11:73.
  28. Krist AH, Woolf SH, Rothemich SF, Johnson RE, Peele JE, Cunningham TD, Longo DR, Bello GA, Matzke GR. Interactive preventive health record to enhance delivery of recommended care: a randomized trial. *Ann Fam Med*. Jul 2012;10:312-319.
  29. Department of Family Medicine. Virginia Commonwealth University. A How-To Guide for Using Patient-Centered Personal Health Records to Promote Prevention. 2012; <http://healthit.ahrq.gov/KRIST-IPHR-Guide-0612.pdf> Accessed June, 2012.
  30. Kuzel AJ. Sampling in Qualitative Inquiry. In Crabtree BF, Miller WL. *Doing Qualitative Research*. 2 ed. California: Sage Oaks; 1999, p 34.
  31. McNamara C. Basics of Conducting Focus Groups. Available at: <http://managementhelp.org/businessresearch/focus-groups.htm>. Accessed Oct, 2011.
  32. Crabtree BF, Miller WL. *Doing Qualitative Research*. 2 ed. California: Sage Oaks; 1999.
  33. Kuzel AJ. *ibid*. p 42.
  34. Blumenthal D, Tavenner M. The "meaningful use" regulation for electronic health records. *N Engl J Med*. Aug 5 2010;363(6):501-504.
  35. The American Recovery and Reinvestment Act of 2009. Available at: <http://thomas.loc.gov/cgi-bin/query/z?c111:H.R.1>. Accessed June, 2012.
  36. Ackerman K. Heavy hitters hit HIMSS stages to stump for health IT *iHealthBeat*. Available at: <http://www.ihealthbeat.org/features/2011/heavy-hitters-hit-himss-stages-to-stump-for-health-it.aspx>. Accessed June, 2012.
  37. Connecting for Health. Americans Overwhelmingly Believe Electronic Personal Health Records Could Improve Their Health. *Markle Foundation; June 2008*. Available at: <http://www.connectingforhealth.org/resources/ResearchBrief-200806.pdf>. Accessed June, 2012.
  38. An Update on Google Health, *Google, Official Blog, June 24 2011 at 2:02PM*. Available at: <http://googleblog.blogspot.com/2011/06/update-on-google-health-and-google.html#!/2011/06/update-on-google-health-and-google.html> Accessed June, 2012.

20

- 1  
2  
3  
4  
5  
6  
7  
8  
9  
10  
11  
12  
13  
14  
15  
16  
17  
18  
19  
20  
21  
22  
23  
24  
25  
26  
27  
28  
29  
30  
31  
32  
33  
34  
35  
36  
37  
38  
39  
40  
41  
42  
43  
44  
45  
46  
47  
48  
49  
50  
51  
52  
53  
54  
55  
56  
57  
58  
59  
60
39. IBM: Smarter Planet, Smarter Healthcare. Available at: [http://www.ibm.com/smarterplanet/us/en/healthcare\\_solutions/ideas/index.html](http://www.ibm.com/smarterplanet/us/en/healthcare_solutions/ideas/index.html) Accessed June 2012.
40. Lumpkin JR, Richards MS. Transforming The Public Health Information Infrastructure. *Health Aff* 2002; 21(6):45-56.
41. Wakefield SW, Kruse RL, Wakefield BJ, Koopman RJ, Keplinger LE, Canfield SM, Mehr DR. Consistency of patient preferences about a secure Internet-based patient communications portal: contemplating, enrolling, and using. *Am J Med Qual* 2012; published online April 18, 2012.
42. Weitzman ER, Kaci L, Mandl KD. Acceptability of a Personally Controlled Health Record in a Community-Based Setting: Implications for Policy and Design. *J Med Internet Res* 2009; 11: e14.
43. Holden RJ, Karsh BT. The Technology Acceptance Model: Its past and its future in health care. *Journal of Biomedical Informatics* 2010;43; 159–172.
44. Kim J, Park HA. Development of a Health Information Technology Acceptance Model Using Consumers' Health Behavior Intention *J Med Internet Res*. 2012 Oct 1;14(5):e133.
45. Krist AH, McCormally T. What Patients Want from their Doctor's Website. *Fam Med* 2001; 33:552.
46. State and County Quick Facts, United states Census Bureau. Available at <http://quickfacts.census.gov/qfd/states/51/51059.html> accessed February 2012.
47. Rice RE. Influences, usage, and outcomes of Internet health information searching: multivariate results from the Pew surveys. *International Journal of Medical Informatics* 2006; 75: 8-28.
48. Miller EA, West DM. Characteristics Associated With Use of Public and Private Web Sites as Sources of Health Care Information *Results From a National Survey Med Care* 2007;45: 245–251.
49. Ybarra ML, Sumanb M. Help seeking behavior and the Internet: A national survey. *International Journal of Medical Informatics* 2006; 75: 29-41.
50. Yamin CK, *et.al.*. The digital divide in adoption and use of a personal health record. *Arch Intern Med*. 2011 Mar 28;171(6):568-74.
51. Bagchi A, Moreno L, af Ursin R. Considerations in Designing Personal Health Records for Underserved Populations. Mathematica Policy Research, Inc. April 2007. Available at: <http://www.mathematica-mpr.com/publications/pdfs/hlthcaredisparib1.pdf>. Accessed February 2012.
52. Moreno L, Peterson S, Bagchi A, and af Ursin R. Personal Health Records: What Do Underserved Consumers Want? Mathematica Policy Research, Inc. May 2007. Available at: <http://www.mathematica-mpr.com/publications/PDFs/phrissuebr.pdf> Accessed February 2012.



## HOW PATIENTS WANT TO ENGAGE WITH THEIR PERSONAL HEALTH RECORD: A QUALITATIVE STUDY

|                                 |                                                                                                                                                                                                                                                                                                                                                                                                 |
|---------------------------------|-------------------------------------------------------------------------------------------------------------------------------------------------------------------------------------------------------------------------------------------------------------------------------------------------------------------------------------------------------------------------------------------------|
| Journal:                        | <i>BMJ Open</i>                                                                                                                                                                                                                                                                                                                                                                                 |
| Manuscript ID:                  | bmjopen-2013-002931.R1                                                                                                                                                                                                                                                                                                                                                                          |
| Article Type:                   | Research                                                                                                                                                                                                                                                                                                                                                                                        |
| Date Submitted by the Author:   | 10-Jun-2013                                                                                                                                                                                                                                                                                                                                                                                     |
| Complete List of Authors:       | Kerns, John; Shenandoah Valley Family Practice Residency, ; Virginia Commonwealth University, Family Medicine<br>Krist, Alexander; Virginia Commonwealth University, Family Medicine<br>Longo, Daniel; Virginia Commonwealth University, Family Medicine<br>Kuzel, Anton; Virginia Commonwealth University, Family Medicine<br>Woolf, Steven; Virginia Commonwealth University, Family Medicine |
| <b>Primary Subject Heading</b>: | Health informatics                                                                                                                                                                                                                                                                                                                                                                              |
| Secondary Subject Heading:      | General practice / Family practice, Patient-centred medicine, Qualitative research                                                                                                                                                                                                                                                                                                              |
| Keywords:                       | Health informatics < BIOTECHNOLOGY & BIOINFORMATICS, PRIMARY CARE, PREVENTIVE MEDICINE, QUALITATIVE RESEARCH                                                                                                                                                                                                                                                                                    |
|                                 |                                                                                                                                                                                                                                                                                                                                                                                                 |

SCHOLARONE™  
Manuscripts



**Article Focus:**

What are necessary elements for patient engagement in advanced interactive personal health records (IPHRs)?

**Key Messages:**

Engagement in an IPHR is related to integration into current care and the patient-clinician relationship.

Models of technology success and acceptance may warrant modification when applied to primary care use of IPHRs.

**Strengths/Weaknesses:**

An advanced IPHR shown to increase use of preventive services was employed for the study.

The sample was drawn from northern Virginia, USA. Other locales may have different IPHR needs and require different strategies to engage patients in IPHR use.

Most participants had ongoing established relationships with their clinician.

**ABSTRACT**

**Objective:** To assess factors related to use and non-use of a sophisticated interactive preventive health record (IPHR) designed to promote uptake of 18 recommended clinical preventive services; Little is known about how patients want to use or be engaged by such advanced information tools.

**Design:** Descriptive and interpretive qualitative analysis of transcripts and field notes from focus groups of IPHR users and of patients who were invited but did not use the IPHR (non-users). Grounded theory techniques were then applied via an editing approach for key emergent themes.

**Setting:** Primary care patients in eight practices of the Virginia Ambulatory Care Outcomes Research Network (ACORN).

**Participants:** Three focus groups involved a total of 14 IPHR users and 2 groups of non-users totaled 14 participants.

**Outcomes/Results:** For themes identified (relevance, trust, and functionality) participants indicated that endorsement and use of the IPHR by their personal clinician was vital. In particular, participants' comments linked IPHR use to: 1) integrating the IPHR into current care, 2) promoting effective patient-clinician encounters and communication, and 3) their confidence in the accuracy, security and privacy of the information.

**Conclusion:** In addition to patients' stated desires for advanced functionality and information accuracy and privacy, successful adoption of IPHRs by primary care patients depends on such technology's relevance, and on its promotion via integration with primary care practices' processes and the patient-



1  
2  
3 clinician relationship. Accordingly, models of technological success and adoption, when applied to  
4 primary care, may need to include the patient-clinician relationship and practice workflow. These  
5 findings are important for health care providers, the information technology industry, and policymakers  
6 who share an interest in encouraging patients to use PHRs.  
7

8  
9 Trial Registration Clinicaltrials.gov identifier: NCT00589173  
10

11 Funding support: This work was supported by the Agency for Healthcare Research and Quality (R18  
12 HS17046-01).  
13

14  
15 **Key words:** health promotion; information management; informatics; patient-centered care; physician-  
16 patient relations  
17

18  
19 This study was approved by the Institutional Review Board of Virginia Commonwealth University,  
20 Richmond, Virginia, USA.  
21  
22  
23  
24  
25  
26  
27  
28  
29  
30  
31  
32  
33  
34  
35  
36  
37  
38  
39  
40  
41  
42  
43  
44  
45  
46  
47  
48  
49  
50  
51  
52  
53  
54  
55  
56  
57  
58  
59  
60

## BACKGROUND

1 The concept of patient-centered care is not new to medicine.<sup>1,2</sup> Decades ago, research demonstrated  
2 that engaging patients in their care improves patient satisfaction, quality of care, and clinical  
3 outcomes.<sup>3,4</sup> Recently, national movements aimed at transforming healthcare have formally defined,  
4 incentivized, and institutionalized patient-centered care. The goals of the Patient-Centered Medical  
5 Home espouse these principles.<sup>5,6</sup> State and national legislation combined with payer initiatives now  
6 encourage and support practices to provide patient-centered care.<sup>7,8</sup> The national *Meaningful Use*  
7 *Roadmap* defines patient and family engagement from a patient perspective as “actions we must take  
8 over time to obtain the greatest benefit from the health care services available to us”, further stating  
9 that engagement is both desirable and necessary for health information systems.<sup>5,9,10</sup>

10  
11 Personal health records (PHRs) are an important resource to help practices provide patient-centered  
12 care. Currently, the most common functions performed by PHRs include record keeping, secure  
13 messaging, appointment scheduling, and bill payment.<sup>11</sup> Yet, other PHR features could help facilitate  
14 patient engagement in their medical care, including use of plain English depictions of clinical data,  
15 motivational messages to seek needed care, educational resources, decision aids, and resources and  
16 tools to support and guide care.<sup>12,13</sup>

17  
18 While electronic PHRs have been available for more than a decade and have wide adoption in some  
19 large healthcare organizations,<sup>14,15</sup> they are used by only a fraction of Americans, and practices struggle  
20 to promote patient adoption.<sup>11-13, 16-23</sup> One possible reason for poor PHR uptake is that many systems  
21 lack integration into the care delivery system, including clinicians’ EMRs.<sup>13,17,21</sup> Tang and Lee suggest that  
22 integrated PHRs could provide patients better access to laboratory and other data, as well as  
23 communication with their clinician\*. This, they posit, will facilitate “the type of physician-patient  
24 relationship that will improve health.”<sup>19</sup>

25  
26 To date PHR adoption has typically been approached from clinician<sup>23,24</sup> or technology-driven<sup>24,25</sup>  
27 perspectives, operating under the assumption that increasing the number of clinicians using an EMR will  
28 increase the number of patients who use a PHR.<sup>23</sup> National survey data suggest and others have

---

\* (Herein ‘clinician’ means physician, nurse practitioner, or physician assistant.)

1  
2  
3 29 advocated that patient PHR adoption would better increased by designing and promoting more patient-  
4  
5 30 centered PHRs that consider patients' individual and cultural issues as well as promote the patient-  
6  
7 31 clinician relationship.<sup>12,22</sup> Similarly, even widely cited models of technology promotion, such as the  
8  
9 32 Model of Information Systems Success (MISS)<sup>26</sup> and the Technology Acceptance Model,<sup>27</sup> have often  
10  
11 33 been applied to healthcare with little patient or clinician perspective.<sup>28,29</sup> or in purposively eschewing  
12  
13 34 "person to person trust" in evaluating such models.<sup>25</sup> To our knowledge, no one has evaluated these  
14  
15 35 models in a patient-centered PHR shown to improve patient outcomes.  
16  
17 36

17 37 In 2007, we created an interactive preventive health record (IPHR) that was designed with greater  
18  
19 38 functionality to engage and activate patients in their preventive care. Details about the design of the  
20  
21 39 IPHR,<sup>30</sup> findings from a randomized controlled trial demonstrating that the IPHR significantly improved  
22  
23 40 preventive care,<sup>31</sup> and a how-to-guide showing practices how they can use their PHRs to better promote  
24  
25 41 preventive care, have been previously published.<sup>32</sup> The IPHR was not meant to be a complete PHR or to  
26  
27 42 replace commercial systems. It did not contain common administrative functions, such as secure  
28  
29 43 messaging, appointment scheduling, or bill paying. Rather, the IPHR was meant to be patient-centered,  
30  
31 44 action-oriented, prevention-focused application that functioned within existing PHRs. Briefly, the IPHR  
32  
33 45 combined a patient's clinical information from his/her clinician's EMR (e.g. history, dates, results) with  
34  
35 46 patient reported information (e.g. family history, health behaviors). The IPHR robustly applied this  
36  
37 47 information to national guidelines from the U.S. Preventive Services Task Force and six other guidelines  
38  
39 48 to provide a very personalized overview of recommended preventive services.<sup>33-40</sup> All recommendations  
40  
41 49 include personalized explanations of the information in plain language, tailored motivational messages,  
42  
43 50 links to additional educational resources and decision aids, tools to promote action, and periodic  
44  
45 51 reminders. The information is shared with both the patient through the IPHR portal and their clinician  
46  
47 52 via their EHR.  
48  
49 53

46 54 While multiple studies have evaluated why patients use PHRs with more basic functionality,<sup>10,16</sup> less is  
47  
48 55 known about their interests in and engagement with PHRs with more advanced patient-centered  
49  
50 56 functionality as provided by the IPHR. As part of our ongoing trials, we used qualitative methods to  
51  
52 57 capture perspectives from both "users" and patients who were invited to use the IPHR but did not use  
53  
54 58 the system ("non-users"), with a lens towards informing the knowledge gaps and varying viewpoints  
55  
56  
57  
58  
59  
60

1  
2  
3 59 about PHR adoption noted above. As framed by Kuzel, this inquiry was “driven not by a need to  
4  
5 60 generalize or predict, but rather by a need to create and test... interpretations.”<sup>41</sup>  
6  
7 61

## 8 62 **METHODS**

### 9 10 11 63 **Design**

12  
13  
14 64 We employed descriptive and interpretive analysis of focus group transcripts and field notes, with data  
15  
16 65 reduction via coding and editing for development of major themes and sub-themes. We then used a  
17  
18 66 combination of grounded theory and editing analysis<sup>42</sup> with initial codes derived from key emergent  
19  
20 67 themes from our interpretive analysis. A trained moderator led the focus groups, using broad-based  
21  
22 68 questions to explore patients’ perspectives about the IPHR and PHRs in general. A focus group guide was  
23  
24 69 used to ensure consistency of procedures, questions, and discussion topics. The guide, developed from  
25  
26 70 ‘discussions with experts familiar with the topic,<sup>42</sup> and focus group process were based on the methods  
27  
28 71 described by Crabtree and Miller<sup>42</sup> and by McNamara.<sup>43</sup> At the beginning of each patient focus group,  
29  
30 72 participants completed a brief printed questionnaire eliciting demographic characteristics and  
31  
32 73 information about interactions with their clinician. The study was approved by the Virginia  
33  
34 74 Commonwealth University Institutional Review Board.

### 35 36 37 38 39 40 41 42 43 44 45 46 47 48 49 50 51 52 53 54 55 56 57 58 59 60 75 **Sample**

76 All participants were patients from one of eight family medicine practices that were located in northern  
77  
78 Virginia and participated in the Virginia Ambulatory Care Outcomes Research Network (ACORN). In  
79  
80 order to address sampling adequacy, a minimum total of 12 participants in both user and non-user  
81  
82 groups was targeted.<sup>44</sup> During the first four months the IPHR was available to the practices, 229 of the  
83  
84 2,250 patients randomly selected and mailed an invitation used the tool (completed registration and  
85  
86 entered data on the website). All of these patients were invited via email to participate in focus groups.  
87  
88 Of the 44 who expressed interest, 30 selected to provide a range of ages, genders, and practice locations  
89  
90 were asked to participate in three user focus groups. (The first user group was rescheduled due to  
91  
92 inclement weather and 3 of 10 participants ultimately attended. The next two groups had 5 and 6 of 10  
93  
94 invited participants attend, respectively.) Of the 2021 non-users, a random sample of 150 patients,  
95  
96 stratified by age, gender, and practice location, were mailed focus group invitations. From the 32  
97  
98 patients who responded to the letter, 20 selected to provide a range of ages, genders, and practice

1  
2  
3 88 locations were asked to participate in two non-user focus groups; 14 attended. Each participant received  
4  
5 89 a \$50 gift card incentive.  
6

## 7 90 **Procedures**

9  
10 91 Focus groups, each approximately 1.5-2 hours in duration, were held at a location near the participating  
11  
12 92 practices. Group discussion was guided by semi-structured questions with probes and prompts to  
13  
14 93 provide follow-up lines of inquiry, clarify topics, and stimulate further discussion. Both user and non-  
15  
16 94 user groups were shown screen-shots demonstrating how the IPHR worked at appropriate times during  
17  
18 95 the groups so all participants could comment on IPHR attributes and uses. Sessions were audio-  
19  
20 96 recorded, and the transcriptions of the recordings were then corrected as necessary via comparison to  
21  
22 97 the original recordings. Field notes were also taken to capture aspects of the group interaction that  
23  
24 98 would not be identified on recordings. This included such observations as participant body language and  
25  
26 99 tone, as well as researcher thoughts and reactions.

27 100 Transcripts and field notes underwent descriptive analysis with a provisional categorical structure based  
28  
29 101 on focus group question guides. Data were combined with field notes to explore descriptive similarities  
30  
31 102 and differences within and between the groups. Coding and editing of transcripts and field notes were  
32  
33 103 used to derive higher level themes and explanations, and tentative explanations of findings were based  
34  
35 104 on both our data and relevant literature. A four-member team (JWK, AHK, DRL, AJK) performed each  
36  
37 105 step of the analysis independently. Differences in coding, development of themes, and derivation of  
38  
39 106 tentative explanations were discussed by the team until consensus was reached. Model development  
40  
41 107 ensued (AHK, JWK), building on key emergent themes from the interpretive analysis. Initially  
42  
43 108 concentrated on contextual thematic interrelationships (e.g. linked Venn diagrams), resultant thematic  
44  
45 109 modifications resulted in iterations of models which were “based on both process and causal  
46  
47 110 considerations”.<sup>26</sup>

48 111

## 49 112 **RESULTS**

### 50 113 **Study Population**

51 114 The patients who used the IPHR during the study period were primarily men (56%), white (85%), and  
52  
53 115 more than 50 years old (68%). Of the 50 patients who agreed to participate in focus groups (30 users  
54  
55 116 and 20 non-users), 28 patients attended the sessions, including 14 PHR users and 14 non-users (Table 1).

56  
57  
58 6  
59  
60

1  
2  
3 117 Focus group participants were predominantly women (64%), white (93%), over 50 years old (86%), and  
4  
5 118 all reported having attended at least some college. Nearly all<sup>o</sup> participants rated their health as good to  
6  
7 119 excellent, stated they had been with their clinician at least 3 years, and rated their clinician highly.  
8

9 **TABLE 1: FOCUS GROUP PARTICIPANTS**

| PARTICIPANT CHARACTERISTICS                                 | 3 PHR User Groups (n=14)                                                            | 2 PHR Non-User Groups (n=14)                                                        | P value |
|-------------------------------------------------------------|-------------------------------------------------------------------------------------|-------------------------------------------------------------------------------------|---------|
| Gender                                                      | 5 male<br>9 female                                                                  | 5 male<br>9 female                                                                  | ns      |
| Mean age (years)                                            | 66 (range 50-77)                                                                    | 59 (range 40-75)                                                                    | 0.07    |
| White (%)                                                   | 100                                                                                 | 86                                                                                  | ns      |
| Participant-reported Education, Number of participants      | Some college/associate degree-5<br>College graduate-2<br>More than college degree-7 | Some college/associate degree-2<br>College Graduate-3<br>More than college degree-9 | ns      |
| Participant-reported number of years with current clinician | 2 participants <1 yr<br>4 participants 3-5yrs<br>8 participants >5yrs               | 0 participants <1 yr<br>8 participants 3-5yrs<br>6 participants >5yrs               | ns      |
| Mean participant-reported visits per year                   | 3.6                                                                                 | 3.4                                                                                 | ns      |
| Mean participant quality rating of current clinician        | 9.23/10<br>0=worst doctor possible<br>10=best doctor possible                       | 9.00/10<br>0=worst doctor possible<br>10=best doctor possible                       | ns      |
| Patient-reported health rating, number of participants      | Excellent-4<br>Very Good-6<br>Good-3<br>Fair-0<br>Poor-1                            | Excellent-3<br>Very Good-7<br>Good-3<br>Fair-1<br>Poor-0                            | ns      |

10  
11  
12  
13  
14  
15  
16  
17  
18  
19  
20  
21  
22  
23  
24  
25  
26  
27  
28  
29  
30  
31  
32  
33  
34  
35  
36  
37  
38 121  
39 122 All but one focus group participant acknowledged using the Internet daily, and some described  
40  
41 123 “constant” Internet use for job and personal purposes. Although nearly all stated that they did not use  
42  
43 124 the Internet as often for health-related matters as for other needs, they did report using the Internet to  
44  
45 125 garner health information, primarily for themselves and their family.  
46  
47 126

### 48 127 Themes

49 128 Across all five focus groups,<sup>\*</sup> three major themes emerged about how participants wanted to be  
50  
51 129 engaged by PHRs: they wanted (1) novel content that was relevant to their immediate and ongoing care,  
52

53  
54  
55 <sup>o</sup> The following is used for the verbal annotation of participant percentages: All=100%, nearly all=80-99%, most=60-  
56 80%, many=40-60%, a majority= >50%, some=25-40%, few=<25%.  
57

130 (2) a PHR they could trust for accuracy, security, and privacy, and (3) a highly functional PHR, facilitating  
 131 care and communication with their clinician, and providing access to comprehensive personalized  
 132 information shared with the clinician. Although practical usefulness was said to be essential, a major  
 133 reason why participants said they trusted, used, and sought relevance in the IPHR was that it was  
 134 offered to them by their personal clinician.

#### 135 Relevance

136 A few participants noted that upcoming appointments with their clinician made IPHR use more  
 137 compelling, contributed to their registering, and led them to notice the content pertinent to that visit.  
 138 Most, however, reported that the invitation for the IPHR was received at a time unassociated with an  
 139 office visit or any specific healthcare needs. Indeed many participants reported that as a result they did  
 140 not feel a pressing need to immediately register for and use the IPHR (Table 2). A few non-users  
 141 declared that they just had not gotten around to registering. Many participants in both the non-user and  
 142 user groups voiced the opinion that they could access similar information on the internet, and that they  
 143 did not recognize that IPHR content was personalized to their needs. Some users commented that they  
 144 had already fully addressed their preventive healthcare needs with their clinician.

145 **TABLE 2: REPRESENTATIVE PARTICIPANT COMMENTS ON RELEVANCE OF THE IPHR**  
 146 **(WHY THEY DIDN'T FEEL A NEED TO REGISTER)**

| Sub-themes                       | Representative Quotations                                                                                                                                                                                                                                                                                                                          |
|----------------------------------|----------------------------------------------------------------------------------------------------------------------------------------------------------------------------------------------------------------------------------------------------------------------------------------------------------------------------------------------------|
| <b>Lacking Urgency</b>           | <p><i>It was procrastination. It wasn't that I wasn't going to do it.</i></p> <p><i>I said, "Boy, this would be -- this is interesting, I should try it." Stuck it in a pile and forgot about it.</i></p>                                                                                                                                          |
| <b>Lacking Novelty</b>           | <p><i>Particularly when it concerns a medical something, I usually look it up, you know, any of the various websites that you can go to.</i></p> <p><i>I am the health related expert in the house. And I have to know what everything is. So yes I go to the Cleveland Clinic and the Mayo Clinic and Johns Hopkins.</i></p>                      |
| <b>Redundant to current care</b> | <p><i>It was not, in my case not new information since my doctor and I had talked about it so much...</i></p> <p><i>She knows what I do for exercise, and she asks me questions when I go in, you know. But, if I didn't have that kind of relationship, then I think I would -- I mean, right now, I don't see, for me, that I need this.</i></p> |

147

148 Trust

---

\* Unless otherwise indicated, findings described herein are from both user and non-user groups.

1  
2  
3 149 Nearly all participants vigorously discussed three components of trust necessary for them to use a PHR:  
4  
5 150 security (protecting their health information), privacy (not sharing their health information with others),  
6  
7 151 and accuracy (ensuring that the clinical content and health recommendations proffered by the system  
8  
9 152 were correct and appropriate for them) (Table 3). Most participants reported trusting the IPHR because  
10  
11 153 it was recommended and used by their clinician's practice. A few participants in the non-user groups  
12  
13 154 indicated discomfort with having any of their personal health information on the Internet. However,  
14  
15 155 most participants in all groups expressed the view that clinician endorsement of the IPHR was an  
16  
17 156 indication that their personal health data were secure. Most participants also expressed strong  
18  
19 157 opposition to PHRs developed by commercial entities and to sharing their health information with their  
20  
21 158 insurance company due to the risk of future denial of coverage.

22  
23  
24  
25  
26  
27  
28  
29  
30  
31  
32  
33  
34  
35  
36  
37  
38  
39  
40  
41  
42  
43  
44  
45  
46  
47  
48  
49  
50  
51  
52  
53  
54  
55  
56  
57  
58  
59  
60

TABLE 3: REPRESENTATIVE PARTICIPANT COMMENTS ON TRUST OF AN IPHR

| Sub-themes      | Representative Quotations                                                                                                                                                                                                                                                                                                                                                                                                                                                                                                                                                                                                                                                                                                  |
|-----------------|----------------------------------------------------------------------------------------------------------------------------------------------------------------------------------------------------------------------------------------------------------------------------------------------------------------------------------------------------------------------------------------------------------------------------------------------------------------------------------------------------------------------------------------------------------------------------------------------------------------------------------------------------------------------------------------------------------------------------|
| <b>Security</b> | <p><i>It (IPHR) came through our own doctor; I didn't have any problem with it. If it had just been out of the blue I might have.</i></p> <p><i>At first I was curious as to what is this (IPHR), but then I guess I trusted it because it was [clinician's office] which I trusted.</i></p> <p><i>I've come to trust him to keep my information in his laptop...you have to trust the doctor.</i></p>                                                                                                                                                                                                                                                                                                                     |
| <b>Privacy</b>  | <p><i>I think personally I would only trust what I was affiliated with. What should be familiar with me. I mean, Google certainly doesn't know me...</i></p> <p><i>Another Participant: Oh, Yes they do.</i></p> <p><i>The information you have on the system, passing data maybe to insurance companies and then turn around later and say no we're not going to insure you...</i></p> <p><i>I got scared...because I got the impression that I was going to discuss things of my personal nature with my doctor on the website and I didn't like that, and so I discarded it because I'd rather talk about my health face to face with my doctor.</i></p>                                                                |
| <b>Accuracy</b> | <p><i>There's so many sites out there that you wonder how valid. I felt good that [the clinician's office was] endorsing or leading me to a particular site that they must feel confident in the information and the content..</i></p> <p><i>One reason I don't do (Internet health information) a whole lot is because you get conflicting views and I don't know who to believe and who not to believe. So I...ask my doctor.</i></p> <p><i>I was getting emotionally distraught over those things that I was reading (on the Internet) and then, come to find out, I didn't even have to be concerned about it. But... I got to leave those kinds of things to the doctor because that's what he's trained for.</i></p> |



1  
2  
3  
4 161 Nearly all participants reported having had difficulties distinguishing between accurate and inaccurate  
5 162 health information on the internet (Table 3). A few participants gave examples of erroneous health  
6  
7 163 information that caused anxiety or led to poor personal health choices. Most participants stated that  
8  
9 164 they asked their clinician to verify information they found on the web. Nearly all participants reported  
10  
11 165 that they would trust the accuracy of the content and recommendations made by the IPHR because it  
12  
13 166 was endorsed and used by their clinician, and identified their clinician as their primary authority on the  
14  
15 167 accuracy and application of healthcare information.

16  
17 169 **Functionality**

18  
19 170 Functions that the participants identified as important involved two subthemes: enhanced patient-  
20  
21 171 clinician communication and patient-centered utility (Table 4).

22 172 **TABLE 4: REPRESENTATIVE PARTICIPANT COMMENTS ON FUNCTIONALITY**

23  
24 173 **Enhanced Patient-Clinician Communication From Using an IPHR**

| Sub-themes                      | Representative Quotations                                                                                                                                                                                                                                                                                                                                                                                                                                                                                                                                                                                                                                                                                                                    |
|---------------------------------|----------------------------------------------------------------------------------------------------------------------------------------------------------------------------------------------------------------------------------------------------------------------------------------------------------------------------------------------------------------------------------------------------------------------------------------------------------------------------------------------------------------------------------------------------------------------------------------------------------------------------------------------------------------------------------------------------------------------------------------------|
| <b>Interactive</b>              | <p data-bbox="415 938 1503 1003"><i>Direct communications between the doctor and the patient that you can access via the Internet just like medical records, you should be able to access that.</i></p> <p data-bbox="415 1037 1503 1129"><i>(As a result of using the IPHR) The nurse called me up and said we haven't seen you in so long, you know, and she starts going through this (prevention) stuff...I said well I've been going to my heart doctor...and she said, you should come back you know.</i></p> <p data-bbox="415 1163 1503 1226"><i>Not dictating, but cooperating, supportive, and provide me the source of the information, let me go there and look at the thing (IPHR) before, you know we make a decision.</i></p> |
| <b>Focus Discussion</b>         | <p data-bbox="415 1232 1503 1297"><i>I have 15 minutes to talk to him. And this gives me the ability to list everything that's wrong with me...This is what you need to talk to the doctor about in your physical.</i></p> <p data-bbox="415 1331 1503 1358"><i>I would think anything that would focus my discussion would hopefully focus his as well.</i></p> <p data-bbox="415 1392 1503 1486"><i>When I go in to the primary care physician, I don't want to just listen to him. I do want to hear what he has to say, but I want to be able to ask what I think are intelligent questions. I'll go do research on that. And then I feel like I can have a better, more productive discussion with the physician.</i></p>               |
| <b>Broaden Discussion</b>       | <p data-bbox="415 1493 1503 1558"><i>What if your doctor disagrees somewhat with the United States Preventive Services Task Force? (as recommended by the IPHR)...It becomes a discussion point.</i></p> <p data-bbox="415 1591 1503 1650"><i>I think it (conversation with clinician) might be a little bit broader (from using the IPHR). You go and say, "Here's what I'm seeing or here's what going on with my family."</i></p>                                                                                                                                                                                                                                                                                                         |
| <b>Efficiency Pros and Cons</b> | <p data-bbox="415 1656 1503 1749"><i>There might be an opportunity to take some of the minor issues off the table(after using the PHR), so when you go to the doctor it would shorten the amount of things that you would like to talk to him about because you've answered some of that already.</i></p> <p data-bbox="415 1782 1503 1843"><i>That email to the doctor, I think, could create a problem. It's very time consuming. You spend all day on the internet answering mail, the doctor will never get paid...SECOND PARTICIPANT: You'd never</i></p>                                                                                                                                                                               |

25  
26  
27  
28  
29  
30  
31  
32  
33  
34  
35  
36  
37  
38  
39  
40  
41  
42  
43  
44  
45  
46  
47  
48  
49  
50  
51  
52  
53  
54  
55  
56  
57  
58  
59  
60

10

|  |                                                                                                                                                                                                                   |
|--|-------------------------------------------------------------------------------------------------------------------------------------------------------------------------------------------------------------------|
|  | <p>get your tetanus shot. FIRST PARTICIPANT: ..You'd never get anything else.</p> <p>So what is this doing for the physician? I mean, we're keeping healthier, but it means a lot more work for him in a way.</p> |
|--|-------------------------------------------------------------------------------------------------------------------------------------------------------------------------------------------------------------------|

174

175 **PATIENT-CENTERED IPHR UTILITY**

| Subthemes                                             | Representative Quotations                                                                                                                                                                                                                                                                                                                                                                                                                                                                                                                                                                                                                                                                                                                                                                                                                                                                                                                                                                                                          |
|-------------------------------------------------------|------------------------------------------------------------------------------------------------------------------------------------------------------------------------------------------------------------------------------------------------------------------------------------------------------------------------------------------------------------------------------------------------------------------------------------------------------------------------------------------------------------------------------------------------------------------------------------------------------------------------------------------------------------------------------------------------------------------------------------------------------------------------------------------------------------------------------------------------------------------------------------------------------------------------------------------------------------------------------------------------------------------------------------|
| <b>Expand Access To Personal Clinical Information</b> | <i>It's not just security, but also access. My access to my personal information. I want to have that, and electronic medical records, Internet-based systems can provide me with that.. I trust my physician here because I've developed a relationship with him, but anybody else, I would want to have absolute access to my information.</i>                                                                                                                                                                                                                                                                                                                                                                                                                                                                                                                                                                                                                                                                                   |
| <b>Align Patient-Clinician Information</b>            | <p><i>Knowing that all the information is correct to the best of your knowledge, and in one place where it can be accessed by the doctor and by you, it makes me feel very secure.</i></p> <p><i>This information is shared with your physician -- as you update things your provider is going to be made aware of this you know-We need to be on the same page.</i></p>                                                                                                                                                                                                                                                                                                                                                                                                                                                                                                                                                                                                                                                           |
| <b>Provide Personalized Information</b>               | <p><i>I think with that information available (in the IPHR), I think it will actually help him a great deal to change my lifestyle. I think that's what all this preventive medicine is all about is how you change your lifestyle.</i></p> <p><i>It also gave me some thoughts about the preventive things I should need to know or that I should be thinking about. So it made me think about, gosh I'll have to ask her. For example, something about an aspirin a day, is it something that's appropriate for me?</i></p> <p><i>There was lots of information there but it was not, in my case not new information since my doctor and I had talked about it so much...</i></p>                                                                                                                                                                                                                                                                                                                                                |
| <b>Comprehensively Address Patient Needs</b>          | <p><i>I'm surprised that this isn't something for medications. One doctor says you got to take calcium and another one says you got to take multivitamin and another one says you got to take an aspirin, and people may be taking allergy medicines that they get over the counter...</i></p> <p><i>Some general thing about menopause or some of the women's issues would have been helpful. Age specific things might be helpful, children, you know, developmental or something like that just as a good reference for parents.</i></p> <p><i>Say you had in your history that you had a history of stroke or cancer, would it also give patient education stuff, like here's a link to the American Cancer Society? Or here's a thing for support group information? I'm a surviving cancer patient...</i></p> <p><i>Here's what we want: we're living here but we want to occasionally go somewhere else. Anyone in the country should be able to open and keep track of it accurately...realistically and securely.</i></p> |

176

177 Many participants stated that they wanted PHRs to enhance communication with their clinician both

178 electronically and in person. Several liked being contacted about preventive care after they used the

179 IPHR. Participants described how the IPHR could focus discussions during office visits, making their visits

180 more productive. Conversely, several also mentioned that the IPHR could appropriately broaden

11

1  
2  
3 181 discussions for some topics, such as identifying preventive screening choices that they or their clinician  
4  
5 182 viewed as warranting dialogue, or starting conversations about lifestyle changes. However, some  
6  
7 183 participants expressed concern that more time would be required for busy clinicians and patients to use  
8  
9 184 the IPHR or similar tools. Participants worried about increased fees for either patients or practices to  
10  
11 185 use similar PHRs in the future.

12 186  
13  
14 187 Many participants said that a critically important feature of the IPHR was the ability for patients to  
15  
16 188 access their personal health information. They explained that this access was important so that they  
17  
18 189 could be “on the same page” as their clinician. They also commented that shared access to information  
19  
20 190 would contribute to improved accuracy of records and more productive interactions.

21 191  
22 192 Many participants identified the personalized advice offered by the IPHR, its prompts to discuss its  
23  
24 193 recommendations with the clinician (e.g. whether to take aspirin), and its ability to prioritize  
25  
26 194 recommendations and thereby highlight critical or information to act on, as very important. Also of  
27  
28 195 interest to many (but not available in this IPHR) were adding features for comprehensive medication  
29  
30 196 reconciliation, in-depth information for the whole family for prevention as well as for specific diseases,  
31  
32 197 and links to local resources that provide support and information for lifestyle changes, preventive care  
33  
34 198 needs, and chronic diseases. Moreover, several participants stated that PHRs, such as the IPHR, should  
35  
36 199 be shared seamlessly across all healthcare providers and settings.

200

## 201 **DISCUSSION**

202 Given the national investment of \$27 billion to promote the adoption, implementation, and meaningful  
203 use of health information technology,<sup>45-47</sup> it is essential to understand how to better engage patients in  
204 using technology if it is to achieve its full potential. Many Americans have not embraced the use of  
205 PHRs,<sup>48</sup> but our findings underscore the general interest of patients in using such tools if certain  
206 attributes are offered.

207

208 When PHR use is integrated into care so that it improves the efficiency and quality of patients' care (e.g.  
209 timely use related to clinician visits), its relevance becomes more transparent. The PHR becomes a  
210 welcome extension of interactions with the clinician and the related healthcare team.

211

1  
2  
3 212 National surveys have clearly documented a level of public concern about personal health information  
4  
5 213 existing on the web and about employers, insurers, or even commercial entities being able to access or  
6  
7 214 misuse such information.<sup>48</sup> Although one could argue that such fears may ease over time as more  
8  
9 215 private information migrates into the cyber-environment, this reticence may have already contributed  
10  
11 216 to the failure of some commercial PHRs to gain wide acceptance by the general public.<sup>49</sup>  
12  
13

14 218 The addition of certain PHR features that seem popular with patients, such as displaying test results or  
15  
16 219 supporting asynchronous communication via secure messaging, has generated only modest increases in  
17  
18 220 actual PHR utilization.<sup>17,21</sup> One explanation is that patients who are accustomed to more powerful  
19  
20 221 information tools in other aspects of life may expect greater functionality than merely seeing their  
21  
22 222 information.<sup>50,51</sup> Indeed, participants in this study wanted much more – including links to personalized  
23  
24 223 recommendations, and resources and tools to help make information actionable to improve health, as  
25  
26 224 provided by this IPHR.  
27

28 226 Across both users and non-users, nearly all participants reported being more likely to perceive a PHR as  
29  
30 227 relevant, trustworthy, and functional if it was offered to them by their personal clinician. We conclude  
31  
32 228 that a key element of engaging patients to use a PHR extends beyond the tool's design and includes how  
33  
34 229 it is presented to patients and integrated into their care experience (Figure 1).  
35

36 231 Although some PHR evaluations seem to show enhanced patient uptake when patients had a *lack* of  
37  
38 232 trust in their clinician,<sup>52,53</sup> other information seems to indicate that encouragement of PHR uptake by a  
39  
40 233 patient's clinician has a positive influence on patient use and that patient and clinician PHR use  
41  
42 234 enhances their relationship.<sup>54</sup> Our findings support Nazi's findings<sup>54</sup> and extend them to show, as in  
43  
44 235 Figure 1, that the patient-clinician relationship explicitly supports all critical components of patient  
45  
46 236 engagement in IPHRs.  
47

48 238 Other models, among them DeLone and McLean's MISS<sup>26</sup> (Figure 2), have been applied to clinical  
49  
50 239 information systems, including PHRs. Booth states that MISS lacks sensitivities to medical and  
51  
52 240 relationship-laden milieus of technology (previously described by Sandelowski),<sup>29,55</sup> whereas Figure 1  
53  
54 241 and our results demonstrate both clinical as well as personal contexts for patients and clinicians.  
55

242 Further, although Archer and colleagues used MISS to categorize aspects of their scoping review of  
 243 PHRs,<sup>23</sup> they only examined selected parts of the model.

245 Differences between Figure 1 and MISS aside, we wish to point out several similarities as well, including  
 246 the previously mentioned use of causal and process elements, and the feedback loop from 'Net Benefits'  
 247 to both 'Use' and 'User Satisfaction'.

249 **FIGURE 1: PERSONAL HEALTH RECORD (PHR) FEATURES NEEDED TO ENGAGE**  
 250 **PATIENTS**

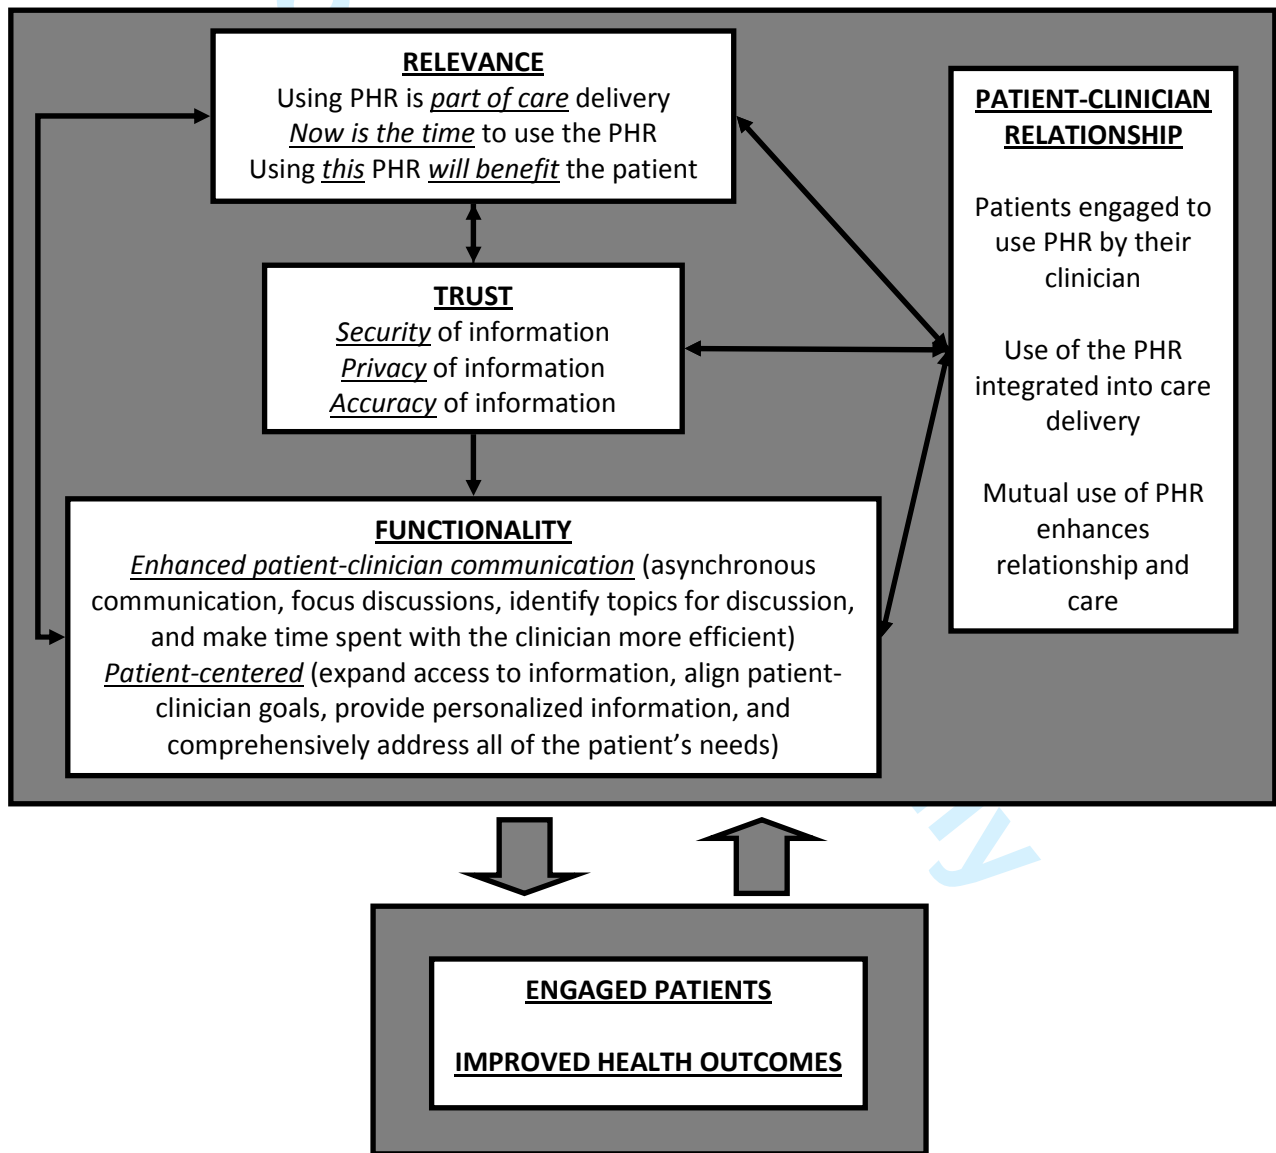

251

1  
2  
3 252  
4  
5 253  
6  
7  
8  
9  
10  
11  
12  
13  
14  
15  
16  
17  
18  
19  
20  
21  
22  
23  
24  
25  
26  
27  
28  
29  
30  
31  
32  
33  
34  
35  
36  
37  
38  
39  
40  
41  
42  
43  
44  
45  
46  
47  
48  
49  
50  
51  
52  
53  
54  
55  
56  
57  
58 15  
59  
60

For peer review only

FIGURE 2: DELONE AND MCLEAN'S MODEL OF INFORMATION SYSTEM SUCCESS<sup>26</sup>

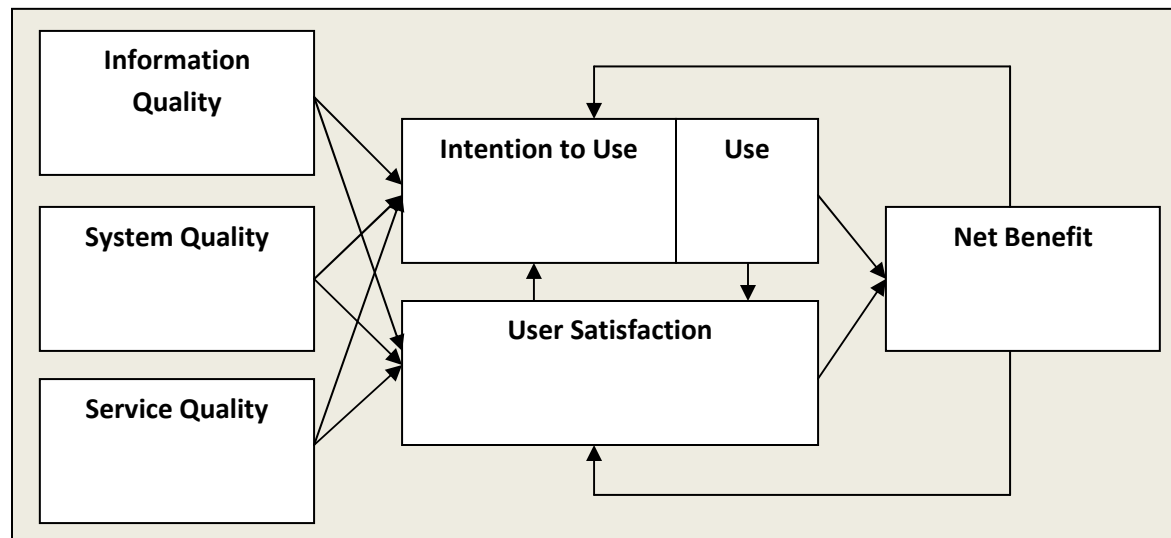

Our study has several important limitations. First, while we attempted to assemble focus groups with a representative range of ages and genders, we may have introduced a selection bias in our sample. Participants were older, more likely to be female, mostly white, and more educated than the overall user and non-user populations.<sup>56,57</sup> However, women are more likely than men to use PHRs<sup>58</sup> and to make healthcare decisions for families.<sup>58-60</sup> Other studies indicate that members of different socioeconomic and racial-ethnic groups may have different PHR preferences (e.g. a PHR not based on the Internet) and may require assistance in using a PHR.<sup>61-63</sup> Second, the sample was drawn entirely from eight practices in northern Virginia. Other locales may have different PHR needs requiring different strategies to engage patients in PHR use. Third, all participants were recruited from family medicine offices that already offered a PHR to patients, and most participants had established relationships with their clinician. Accordingly, participants may have emphasized the value of the patient-clinician relationship in PHR use more than populations from other settings. Lastly, whereas the number of participants (28) will not quantitatively generalize to all IPHR users, the nature of qualitative research is often that of looking at specific cases, many times in order to inform the gaps generated by other data, rather than to compete with or duplicate that information.<sup>42</sup>

## CONCLUSION:

1  
2  
3 282 To engage primary care patients with an IPHR, this study identifies the importance of relevance, trust  
4  
5 283 and functionality, all integrated with office processes and the patient-clinician relationship. In addition  
6  
7 284 to suggesting possible modifications to established models of technological acceptance, these findings  
8  
9 285 have relevance for healthcare providers, the information technology industry, and policymakers who  
10  
11 286 share an interest in encouraging patients to use personal health records or other information tools.  
12  
13 287 Studies like ours should be expanded and replicated in other settings to more fully understand how to  
14  
15 288 make such technology more useful to patients.  
16

289

17 290 **Acknowledgments:** The authors thank the participating study practices: Fairfax Family Practice,  
18 291 Gainesville Family Medicine, Herndon Family Medicine, Lorton Station Family Medicine, Prince William  
19 292 Family Medicine, South Riding Family Medicine, Town Center Family Medicine, and Vienna Family  
20 293 Medicine. We received invaluable advice and assistance with the focus groups from Christine C. Kerns,  
21 294 RN, and in designing the project from Stephen F. Rothemich MD, MS. as well as Kristin Schmidt in  
22 295 project assistance.

23 296 **Conflicts of interest:** Virginia Commonwealth University holds the intellectual property rights to the  
24 297 interactive preventive care record evaluated in this study. Although the university and developers are  
25 298 entitled to the system's revenue, MyPreventiveCare is a noncommercial product, and no revenues have  
26 299 been generated other than grant funding.  
27  
28  
29  
30  
31  
32  
33  
34  
35  
36  
37  
38  
39  
40  
41  
42  
43  
44  
45  
46  
47  
48  
49  
50  
51  
52  
53  
54  
55  
56  
57  
58  
59  
60



## REFERENCES

1. Stewart M, Brown JB, Weston WW, McWhinney IR, McWilliam CL, Freeman TR. *Patient-Centered Medicine: Transforming the Clinical Method*. Thousand Oaks, CA: Sage Publications, Inc.; 1995.
2. Stewart M. Towards a global definition of patient centred care. *Bmj*. Feb 24 2001;322(7284):444-445.
3. Greenfield S, Kaplan S, Ware JE Jr. Expanding patient involvement in care. Effects on patient outcomes. *Ann Intern Med* 1985;102(4): 520-8.
4. Kaplan SH, Greenfield S, Ware JE Jr. Assessing the effects of physician-patient interactions on the outcomes of chronic disease. *Med Care* 1989; 27(3):S110-S127.
5. Joint Principles of the Patient-Centered Medical Home. *American Academy of Family Physicians, American Academy of Pediatricians, American Osteopathic Association*. Available at: <http://www.pcpcc.net/>. Accessed Oct, 2011.
6. NCQA - Measuring Quality. Improving Health Care. *National Committee for Quality Assurance*. Available at: <http://www.ncqa.org>. Accessed October, 2011.
7. The Patient Protection and Affordable Care Act. Section 4103. *Public Law 111-148*. 2nd Session ed; 2010.
8. Bielaszka-DuVernay C, Soll RF, Kantak AD, et al. Vermont's Blueprint for medical homes, community health teams, and better health at lower cost Evaluating the medical evidence for quality improvement Management of high-order multiple births: application of lessons learned because of participation in Vermont Oxford Network collaboratives. *Health Aff (Millwood)*. Mar Nov 2006;30(3):383-386.
9. Blumenthal D, Tavenner M. The "meaningful use" regulation for electronic health records. *N Engl J Med*. Aug 5 2010;363(6):501-504.
10. Health IT. *The Office of the National Coordinator for Health Information Technology*. U.S. Department of Health & Human Services. Available at: <http://healthit.hhs.gov>. Accessed July, 2011.
11. Hing E, Burt CW. Office-based medical practices: methods and estimates from the national ambulatory medical care survey. *Adv Data*. Mar 12 2007(383):1-15.
12. Krist AH, Woolf SH. A vision for patient-centered health information systems. *JAMA*. 2011;305(3):300-301.
13. Wang CJ, Huang JT. Integrating technology into healthcare: what will it take? *JAMA* 2012; 307(6): 569-570.
14. Petersen H. A (very) popular health record. Available at: [http://xnet.kp.org/newscenter/pressreleases/nat/2012/080612\\_4\\_million\\_phr\\_registered\\_users.html](http://xnet.kp.org/newscenter/pressreleases/nat/2012/080612_4_million_phr_registered_users.html) Accessed May, 2013.
15. Poorsina R, Wardell A. Four million people choose connectivity and convenience with Kaiser Permanente's personal health record. Available at: <http://www.va.gov/health/NewsFeatures/2013/March/A-Very-Popular-Personal-Health-Record.asp> Accessed May, 2013.
16. Internet usage over time. *Pew Internet and American Life*. Available at: <http://www.pewinternet.org/>. Accessed Oct, 2011.
17. Silvestre AL, Sue VM, Allen JY. If you build it, will they come? The Kaiser Permanente model of online health care. *Health Aff (Millwood)*. Mar-Apr 2009;28(2):334-344.

18

- 1
  - 2
  - 3
  - 4
  - 5
  - 6
  - 7
  - 8
  - 9
  - 10
  - 11
  - 12
  - 13
  - 14
  - 15
  - 16
  - 17
  - 18
  - 19
  - 20
  - 21
  - 22
  - 23
  - 24
  - 25
  - 26
  - 27
  - 28
  - 29
  - 30
  - 31
  - 32
  - 33
  - 34
  - 35
  - 36
  - 37
  - 38
  - 39
  - 40
  - 41
  - 42
  - 43
  - 44
  - 45
  - 46
  - 47
  - 48
  - 49
  - 50
  - 51
  - 52
  - 53
  - 54
  - 55
  - 56
  - 57
  - 58
  - 59
  - 60
18. Ralston JD, Coleman K, Reid RJ, Handley MR, Larson EB. Patient experience should be part of meaningful-use criteria. *Health Aff (Millwood)*. Apr 2010;29(4):607-613.
19. Tang PC, Lee TH. Your doctor's office or the Internet? Two paths to personal health records. *N Engl J Med*. Mar 26 2009;360(13):1276-1278.
20. CAHPS Clinician & Group Survey. *Agency for Healthcare Research and Quality*. Available at: [https://www.cahps.ahrq.gov/content/products/CG/PROD\\_CG\\_CG40Products.asp?p=1021&s=213](https://www.cahps.ahrq.gov/content/products/CG/PROD_CG_CG40Products.asp?p=1021&s=213). Accessed Sept, 2011.
21. Dickinson WP, et. al. Use of a Website to Accomplish Health Behavior Change: If You Build It, Will They Come? And Will It Work If They Do? *J Am Board Fam Med* 2013;26:168–176.
22. Wen KY, Kreps G, Zhu F, Miller S. Consumers' perceptions about and use of the internet for personal health records and health information exchange: analysis of the 2007 Health Information National Trends Survey. *J Med Internet Res*. 2010 Dec 18;12(4):e73.
23. Archer N, Fevrier-Thomas U, Lokker C, McKibbin KA, Straus SE. Personal health records: a scoping review. *J Am Med Assoc* 2011;18:515e522.
24. Forsythe DE. New bottles, old wine. Hidden cultural assumptions in a computerized explanation system for migraine sufferers. *Med Anthro Quart* 1996;10:551-74.
25. McKnight DH, Carter M, Thatcher JB, and Clay PF. Trust in a Specific Technology: An Investigation of its Components and Measures. *ACM Transactions on Management Information Systems*. 2011; 2(2): 1-15.
26. DeLone WH and McLean ER. The DeLone and McLean Model of Information Systems Success: A Ten-Year Update. *J Management Information Systems* 2003;19:9-30.
27. Davis FD. Perceived usefulness, perceived ease of use, and user acceptance of information technology. *MIS Q* 1989;13:319–39.
28. Moores TT. Towards an integrated model of IT acceptance in healthcare. *Decision Support Systems* 53 (2012) 507–516.
29. Booth RG. Examining the functionality of the DeLone and McLean information system success model as a framework for synthesis in nursing information and communication technology research. *CIN* 2012; 30; 330-345.
30. Designing a patient-centered personal health record to promote preventive care. *BMC Med Inform Decis Mak*. 2011;11:73.
31. Krist AH, Woolf SH, Rothemich SF, Johnson RE, Peele JE, Cunningham TD, Longo DR, Bello GA, Matzke GR. Interactive preventive health record to enhance delivery of recommended care: a randomized trial. *Ann Fam Med*. Jul 2012;10:312-319.
32. Department of Family Medicine. Virginia Commonwealth University. A How-To Guide for Using Patient-Centered Personal Health Records to Promote Prevention. 2012; <http://healthit.ahrq.gov/KRIST-IPHR-Guide-0612.pdf> Accessed June, 2012.
33. Complete Report: the Seventh Report of the Joint National Committee of Prevention, Detection, Evaluation, and Treatment of High Blood Pressure. Vol NIH Pub. No. 04-5239. Bethesda, MD: National Heart, Lung, and Blood Institute; 2004.
34. Chobanian AV, Bakris GL, Black HR, et al. The Seventh Report of the Joint National Committee on Prevention, Detection, Evaluation, and Treatment of High Blood Pressure: the JNC 7 report. *Jama*. May 21 2003;289(19):2560-2572.

- 1  
2  
3  
4  
5  
6  
7  
8  
9  
10  
11  
12  
13  
14  
15  
16  
17  
18  
19  
20  
21  
22  
23  
24  
25  
26  
27  
28  
29  
30  
31  
32  
33  
34  
35  
36  
37  
38  
39  
40  
41  
42  
43  
44  
45  
46  
47  
48  
49  
50  
51  
52  
53  
54  
55  
56  
57  
58  
59  
60
35. Grundy SM, Cleeman JI, Merz CN, et al. Implications of recent clinical trials for the National Cholesterol Education Program Adult Treatment Panel III guidelines. *Circulation*. Jul 13 2004;110(2):227-239.
  36. National Cholesterol Education Program. Third report of the expert panel on detection, evaluation, and treatment of high blood cholesterol in adults. Vol NIH Pub. No. 02-5215. Bethesda, MD: National Heart, Lung, and Blood Institute; 2002.
  37. American Diabetes Association (ADA). Standards of medical care in diabetes. II. Testing for pre-diabetes and diabetes in asymptomatic patients. *Diabetes care*. Jan 2008;31(Suppl 1):S13-14.
  38. Recommendation and Guidelines: Advisory Committee on Immunization Practices (ACIP). *Department of Health and Human Services. Centers for Disease Control and Prevention*. Available at: <http://www.cdc.gov/vaccines/recs/ACIP/default.htm>. Accessed January, 2010.
  39. U.S. Department of Health and Human Services. Healthy People 2010: Understanding and Improving Health. 2nd ed. Washington, D.C.: Government Printing Office; November 2000.
  40. Dietary Guidelines for Americans 2005. *Department of Health and Human Services and the Department of Agriculture*. Available at: <http://www.healthierus.gov/dietaryguidelines/>. Accessed July, 2011.
  41. Kuzel AJ. Sampling in Qualitative Inquiry. In Crabtree BF, Miller WL. *Doing Qualitative Research*. 2 ed. California: Sage Oaks; 1999, p 34.
  42. Crabtree BF, Miller WL. *Doing Qualitative Research*. 2 ed. California: Sage Oaks; 1999.
  43. McNamara C. Basics of Conducting Focus Groups. Available at: <http://managementhelp.org/businessresearch/focus-groups.htm>. Accessed Oct, 2011.
  44. Kuzel AJ. *ibid*. p 42.
  45. Blumenthal D, Tavenner M. The "meaningful use" regulation for electronic health records. *N Engl J Med*. Aug 5 2010;363(6):501-504.
  46. The American Recovery and Reinvestment Act of 2009. Available at: <http://thomas.loc.gov/cgi-bin/query/z?c111:H.R.1>. Accessed June, 2012.
  47. Ackerman K. Heavy hitters hit HIMSS stages to stump for health IT *iHealthBeat*. Available at: <http://www.ihealthbeat.org/features/2011/heavy-hitters-hit-himss-stages-to-stump-for-health-it.aspx>. Accessed June, 2012.
  48. Connecting for Health. Americans Overwhelmingly Believe Electronic Personal Health Records Could Improve Their Health. *Markle Foundation; June 2008*. Available at: <http://www.connectingforhealth.org/resources/ResearchBrief-200806.pdf>. Accessed June, 2012.
  49. An Update on Google Health, *Google, Official Blog, June 24 2011 at 2:02PM*. Available at: <http://googleblog.blogspot.com/2011/06/update-on-google-health-and-google.html#!/2011/06/update-on-google-health-and-google.html> Accessed June, 2012.
  50. Wakefield SW, Kruse RL, Wakefield BJ, Koopman RJ, Keplinger LE, Canfield SM, Mehr DR. Consistency of patient preferences about a secure Internet-based patient communications portal: contemplating, enrolling, and using. *Am J Med Qual* 2012; published online April 18, 2012.

- 1  
2  
3 300 51. Weitzman ER, Kaci L, Mandl KD. Acceptability of a Personally Controlled Health Record in a  
4 301 Community-Based Setting: Implications for Policy and Design. *J Med Internet Res* 2009; 11: e14.  
5 302 52. Fisher B, Bhavnani V, and Winfield M. How patients use access to their full health records: a  
6 303 qualitative study of patients in general practice *J R Soc Med* 2009 102: 539-44.  
7 304 53. Wibe T, Hellesø R, Slaughter L, Ekstedt M. Lay people's experiences with reading their medical  
8 305 record. *Social Science & Medicine* 2011: 72; 1570-1573.  
9 306 54. Nazi KM. The personal health record paradox: health care professionals' perspectives and the  
10 307 information ecology of personal health record systems in organizational and clinical settings. *J*  
11 308 *Med Internet Res*. 2013 April; 15(4): e70.  
12 309 55. Sandelowski M. (Ir)Reconcilable differences? the debate concerning nursing and technology. *J*  
13 310 *Nurs Scholarsh*. 1997;29(2):169–174.  
14 311 56. Krist AH, McCormally T. What Patients Want from their Doctor's Website. *Fam Med* 2001;  
15 312 33:552.  
16 313 57. State and County Quick Facts, United states Census Bureau. Available at  
17 314 <http://quickfacts.census.gov/qfd/states/51/51059.html> accessed February 2012.  
18 315 58. Rice RE. Influences, usage, and outcomes of Internet health information searching: multivariate  
19 316 results from the Pew surveys. *International Journal of Medical Informatics* 2006; 75: 8-28.  
20 317 59. Miller EA, West DM. Characteristics Associated With Use of Public and Private Web Sites as  
21 318 Sources of Health Care Information *Results From a National Survey Med Care* 2007;45: 245–251.  
22 319 60. Ybarra ML, Sumanb M. Help seeking behavior and the Internet: A national survey. *International*  
23 320 *Journal of Medical Informatics* 2006; 75: 29-41.  
24 321 61. Yamin CK, *et.al.*. The digital divide in adoption and use of a personal health record. *Arch Intern*  
25 322 *Med*. 2011 Mar 28;171(6):568-74.  
26 323 62. Bagchi A, Moreno L, af Ursin R. Considerations in Designing Personal Health Records for  
27 324 Underserved Populations. Mathematica Policy Research, Inc. April 2007. Available at:  
28 325 <http://www.mathematica-mpr.com/publications/pdfs/hlthcaredisparib1.pdf>. Accessed February  
29 326 2012.  
30 327 63. Moreno L, Peterson S, Bagchi A, and af Ursin R. Personal Health Records: What Do Underserved  
31 328 Consumers Want? Mathematica Policy Research, Inc. May 2007. Available at:  
32 329 <http://www.mathematica-mpr.com/publications/PDFs/phrissuebr.pdf> Accessed February 2012.

**Article Focus:**

What are necessary elements for patient engagement in advanced interactive personal health records (IPHRs)?

**Key Messages:**

Engagement in an IPHR is related to integration into current care and the patient-clinician relationship.

Models of technology success and acceptance may warrant modification when applied to primary care use of IPHRs.

**Strengths/Weaknesses:**

An advanced IPHR shown to increase use of preventive services was employed for the study.

The sample was drawn from northern Virginia, USA. Other locales may have different IPHR needs and require different strategies to engage patients in IPHR use.

Most participants had ongoing established relationships with their clinician.

**ABSTRACT**

**Objective:** To assess factors related to use and non-use of a sophisticated interactive preventive health record (IPHR) designed to promote uptake of 18 recommended clinical preventive services; Little is known about how patients want to use or be engaged by such advanced information tools.

**Design:** Descriptive and interpretive qualitative analysis of transcripts and field notes from focus groups of IPHR users and of patients who were invited but did not use the IPHR (non-users). **Grounded theory techniques were then applied via an editing approach for key emergent themes.**

**Setting:** Primary care patients in eight practices of the Virginia Ambulatory Care Outcomes Research Network (ACORN).

**Participants:** Three focus groups involved a total of 14 IPHR users and 2 groups of non-users totaled 14 participants.

**Outcomes/Results:** For themes identified (relevance, trust, and functionality) participants indicated that endorsement and use of the IPHR by their personal clinician was vital. In particular, participants' comments linked IPHR use to: 1) integrating the IPHR into current care, 2) promoting effective patient-clinician encounters and communication, and 3) their confidence in the accuracy, security and privacy of the information.

**Conclusion:** In addition to patients' stated desires for advanced functionality and information accuracy and privacy, successful adoption of IPHRs by primary care patients depends on such technology's relevance, and on its promotion via integration with primary care practices' processes and the patient-

1  
2  
3 clinician relationship. Accordingly, models of technological success and adoption, when applied to  
4 primary care, may need to include the patient-clinician relationship and practice workflow. These  
5 findings are important for health care providers, the information technology industry, and policymakers  
6 who share an interest in encouraging patients to use PHRs.  
7

8  
9 Trial Registration Clinicaltrials.gov identifier: NCT00589173  
10

11 Funding support: This work was supported by the Agency for Healthcare Research and Quality (R18  
12 HS17046-01).  
13

14  
15 **Key words:** health promotion; information management; informatics; patient-centered care; physician-  
16 patient relations  
17

18  
19 This study was approved by the Institutional Review Board of Virginia Commonwealth University,  
20 Richmond, Virginia, USA.  
21  
22  
23  
24  
25  
26  
27  
28  
29  
30  
31  
32  
33  
34  
35  
36  
37  
38  
39  
40  
41  
42  
43  
44  
45  
46  
47  
48  
49  
50  
51  
52  
53  
54  
55  
56  
57  
58  
59  
60

## BACKGROUND

1 The concept of patient-centered care is not new to medicine.<sup>1,2</sup> Decades ago, research demonstrated  
2 that engaging patients in their care improves patient satisfaction, quality of care, and clinical  
3 outcomes.<sup>3,4</sup> Recently, national movements aimed at transforming healthcare have formally defined,  
4 incentivized, and institutionalized patient-centered care. The goals of the Patient-Centered Medical  
5 Home espouse these principles.<sup>5,6</sup> State and national legislation combined with payer initiatives now  
6 encourage and support practices to provide patient-centered care.<sup>7,8</sup> The national *Meaningful Use*  
7 *Roadmap* defines patient and family engagement from a patient perspective as “actions we must take  
8 over time to obtain the greatest benefit from the health care services available to us”, further stating  
9 that engagement is both desirable and necessary for health information systems.<sup>5,9,10</sup>

10  
11 Personal health records (PHRs) are an important resource to help practices provide patient-centered  
12 care. Currently, the most common functions performed by PHRs include record keeping, secure  
13 messaging, appointment scheduling, and bill payment.<sup>11</sup> Yet, other PHR features could help facilitate  
14 patient engagement in their medical care, including use of plain English depictions of clinical data,  
15 motivational messages to seek needed care, educational resources, decision aids, and resources and  
16 tools to support and guide care.<sup>12,13</sup>

17  
18 While electronic PHRs have been available for more than a decade and have wide adoption in some  
19 large healthcare organizations,<sup>14,15</sup> they are used by only a fraction of Americans, and practices struggle  
20 to promote patient adoption.<sup>11-13, 16-23</sup> One possible reason for poor PHR uptake is that many systems  
21 lack integration into the care delivery system, including clinicians’ EMRs.<sup>13,17,21</sup> Tang and Lee suggest that  
22 integrated PHRs could provide patients better access to laboratory and other data, as well as  
23 communication with their clinician\*. This, they posit, will facilitate “the type of physician-patient  
24 relationship that will improve health.”<sup>19</sup>

25  
26 To date PHR adoption has typically been approached from clinician<sup>23,24</sup> or technology-driven<sup>24,25</sup>  
27 perspectives, operating under the assumption that increasing the number of clinicians using an EMR will  
28 increase the number of patients who use a PHR.<sup>23</sup> National survey data suggest and others have

---

\* (Herein ‘clinician’ means physician, nurse practitioner, or physician assistant.)



1  
2  
3 29 advocated that patient PHR adoption would better increased by designing and promoting more patient-  
4  
5 30 centered PHRs that consider patients' individual and cultural issues as well as promote the patient-  
6  
7 31 clinician relationship.<sup>12,22</sup> Similarly, even widely cited models of technology promotion, such as the  
8  
9 32 Model of Information Systems Success (MISS)<sup>26</sup> and the Technology Acceptance Model,<sup>27</sup> have often  
10  
11 33 been applied to healthcare with little patient or clinician perspective.<sup>28,29</sup> or in purposively eschewing  
12  
13 34 "person to person trust" in evaluating such models.<sup>25</sup> To our knowledge, no one has evaluated these  
14  
15 35 models in a patient-centered PHR shown to improve patient outcomes.

16  
17 37 In 2007, we created an interactive preventive health record (IPHR) that was designed with greater  
18  
19 38 functionality to engage and activate patients in their preventive care. Details about the design of the  
20  
21 39 IPHR,<sup>30</sup> findings from a randomized controlled trial demonstrating that the IPHR significantly improved  
22  
23 40 preventive care,<sup>31</sup> and a how-to-guide showing practices how they can use their PHRs to better promote  
24  
25 41 preventive care, have been previously published.<sup>32</sup> The IPHR was not meant to be a complete PHR or to  
26  
27 42 replace commercial systems. It did not contain common administrative functions, such as secure  
28  
29 43 messaging, appointment scheduling, or bill paying. Rather, the IPHR was meant to be patient-centered,  
30  
31 44 action-oriented, prevention-focused application that functioned within existing PHRs. Briefly, the IPHR  
32  
33 45 combined a patient's clinical information from his/her clinician's EMR (e.g. history, dates, results) with  
34  
35 46 patient reported information (e.g. family history, health behaviors). The IPHR robustly applied this  
36  
37 47 information to national guidelines from the U.S. Preventive Services Task Force and six other guidelines  
38  
39 48 to provide a very personalized overview of recommended preventive services.<sup>33-40</sup> All recommendations  
40  
41 49 include personalized explanations of the information in plain language, tailored motivational messages,  
42  
43 50 links to additional educational resources and decision aids, tools to promote action, and periodic  
44  
45 51 reminders. The information is shared with both the patient through the IPHR portal and their clinician  
46  
47 52 via their EHR.

48  
49 54 While multiple studies have evaluated why patients use PHRs with more basic functionality,<sup>10,16</sup> less is  
50  
51 55 known about their interests in and engagement with PHRs with more advanced patient-centered  
52  
53 56 functionality as provided by the IPHR. As part of our ongoing trials, we used qualitative methods to  
54  
55 57 capture perspectives from both "users" and patients who were invited to use the IPHR but did not use  
56  
57 58 the system ("non-users"), with a lens towards informing the knowledge gaps and varying viewpoints



1  
2  
3 59 about PHR adoption noted above. As framed by Kuzel, this inquiry was “driven not by a need to  
4  
5 60 generalize or predict, but rather by a need to create and test... interpretations.”<sup>41</sup>  
6  
7 61

## 8 62 **METHODS**

### 9 10 11 63 **Design**

12  
13  
14 64 We employed descriptive and interpretive analysis of focus group transcripts and field notes, with data  
15  
16 65 reduction via coding and editing for development of major themes and sub-themes. We then used a  
17  
18 66 combination of grounded theory and editing analysis<sup>42</sup> with initial codes derived from key emergent  
19  
20 67 themes from our interpretive analysis. A trained moderator led the focus groups, using broad-based  
21  
22 68 questions to explore patients’ perspectives about the IPHR and PHRs in general. A focus group guide was  
23  
24 69 used to ensure consistency of procedures, questions, and discussion topics. The guide, developed from  
25  
26 70 ‘discussions with experts familiar with the topic,’<sup>42</sup> and focus group process were based on the methods  
27  
28 71 described by Crabtree and Miller<sup>42</sup> and by McNamara.<sup>43</sup> At the beginning of each patient focus group,  
29  
30 72 participants completed a brief printed questionnaire eliciting demographic characteristics and  
31  
32 73 information about interactions with their clinician. The study was approved by the Virginia  
33  
34 74 Commonwealth University Institutional Review Board.

### 35 36 37 75 **Sample**

38  
39 76 All participants were patients from one of eight family medicine practices that were located in northern  
40  
41 77 Virginia and participated in the Virginia Ambulatory Care Outcomes Research Network (ACORN). In  
42  
43 78 order to address sampling adequacy, a minimum total of 12 participants in both user and non-user  
44  
45 79 groups was targeted.<sup>44</sup> During the first four months the IPHR was available to the practices, 229 of the  
46  
47 80 2,250 patients randomly selected and mailed an invitation used the tool (completed registration and  
48  
49 81 entered data on the website). All of these patients were invited via email to participate in focus groups.  
50  
51 82 Of the 44 who expressed interest, 30 selected to provide a range of ages, genders, and practice locations  
52  
53 83 were asked to participate in three user focus groups. (The first user group was rescheduled due to  
54  
55 84 inclement weather and 3 of 10 participants ultimately attended. The next two groups had 5 and 6 of 10  
56  
57 85 invited participants attend, respectively.) Of the 2021 non-users, a random sample of 150 patients,  
58  
59 86 stratified by age, gender, and practice location, were mailed focus group invitations. From the 32  
60  
87 87 patients who responded to the letter, 20 selected to provide a range of ages, genders, and practice

1  
2  
3 88 locations were asked to participate in two non-user focus groups; 14 attended. Each participant received  
4  
5 89 a \$50 gift card incentive.  
6

## 7 90 **Procedures**

9  
10 91 Focus groups, each approximately 1.5-2 hours in duration, were held at a location near the participating  
11  
12 92 practices. Group discussion was guided by semi-structured questions with probes and prompts to  
13  
14 93 provide follow-up lines of inquiry, clarify topics, and stimulate further discussion. Both user and non-  
15  
16 94 user groups were shown screen-shots demonstrating how the IPHR worked at appropriate times during  
17  
18 95 the groups so all participants could comment on IPHR attributes and uses. Sessions were audio-  
19  
20 96 recorded, and the transcriptions of the recordings were then corrected as necessary via comparison to  
21  
22 97 the original recordings. Field notes were also taken to capture aspects of the group interaction that  
23  
24 98 would not be identified on recordings. This included such observations as participant body language and  
25  
26 99 tone, as well as researcher thoughts and reactions.

27 100 Transcripts and field notes underwent descriptive analysis with a provisional categorical structure based  
28  
29 101 on focus group question guides. Data were combined with field notes to explore descriptive similarities  
30  
31 102 and differences within and between the groups. Coding and editing of transcripts and field notes were  
32  
33 103 used to derive higher level themes and explanations, and tentative explanations of findings were based  
34  
35 104 on both our data and relevant literature. A four-member team (JWK, AHK, DRL, AJK) performed each  
36  
37 105 step of the analysis independently. Differences in coding, development of themes, and derivation of  
38  
39 106 tentative explanations were discussed by the team until consensus was reached. **Model development**  
40  
41 107 **ensued (AHK, JWK), building on key emergent themes from the interpretive analysis. Initially**  
42  
43 108 **concentrated on contextual thematic interrelationships (e.g. linked Venn diagrams), resultant thematic**  
44  
45 109 **modifications resulted in iterations of models which were “based on both process and causal**  
46  
47 110 **considerations”.**<sup>26</sup>

48 111

## 49 112 **RESULTS**

### 50 113 **Study Population**

51 114 The patients who used the IPHR during the study period were primarily men (56%), white (85%), and  
52  
53 115 more than 50 years old (68%). Of the 50 patients who agreed to participate in focus groups (30 users  
54  
55 116 and 20 non-users), 28 patients attended the sessions, including 14 PHR users and 14 non-users (Table 1).

56  
57  
58 6  
59  
60

1  
2  
3 117 Focus group participants were predominantly women (64%), white (93%), over 50 years old (86%), and  
4  
5 118 all reported having attended at least some college. Nearly all<sup>o</sup> participants rated their health as good to  
6  
7 119 excellent, stated they had been with their clinician at least 3 years, and rated their clinician highly.

8  
9 120 **TABLE 1: FOCUS GROUP PARTICIPANTS**

| PARTICIPANT CHARACTERISTICS                                 | 3 PHR User Groups (n=14)                                                            | 2 PHR Non-User Groups (n=14)                                                        | P value |
|-------------------------------------------------------------|-------------------------------------------------------------------------------------|-------------------------------------------------------------------------------------|---------|
| Gender                                                      | 5 male<br>9 female                                                                  | 5 male<br>9 female                                                                  | ns      |
| Mean age (years)                                            | 66 (range 50-77)                                                                    | 59 (range 40-75)                                                                    | 0.07    |
| White (%)                                                   | 100                                                                                 | 86                                                                                  | ns      |
| Participant-reported Education, Number of participants      | Some college/associate degree-5<br>College graduate-2<br>More than college degree-7 | Some college/associate degree-2<br>College Graduate-3<br>More than college degree-9 | ns      |
| Participant-reported number of years with current clinician | 2 participants <1 yr<br>4 participants 3-5yrs<br>8 participants >5yrs               | 0 participants <1 yr<br>8 participants 3-5yrs<br>6 participants >5yrs               | ns      |
| Mean participant-reported visits per year                   | 3.6                                                                                 | 3.4                                                                                 | ns      |
| Mean participant quality rating of current clinician        | 9.23/10<br>0=worst doctor possible<br>10=best doctor possible                       | 9.00/10<br>0=worst doctor possible<br>10=best doctor possible                       | ns      |
| Patient-reported health rating, number of participants      | Excellent-4<br>Very Good-6<br>Good-3<br>Fair-0<br>Poor-1                            | Excellent-3<br>Very Good-7<br>Good-3<br>Fair-1<br>Poor-0                            | ns      |

10  
11  
12  
13  
14  
15  
16  
17  
18  
19  
20  
21  
22  
23  
24  
25  
26  
27  
28  
29  
30  
31  
32  
33  
34  
35  
36  
37  
38 121  
39 122 All but one focus group participant acknowledged using the Internet daily, and some described  
40  
41 123 “constant” Internet use for job and personal purposes. Although nearly all stated that they did not use  
42  
43 124 the Internet as often for health-related matters as for other needs, they did report using the Internet to  
44  
45 125 garner health information, primarily for themselves and their family.

46  
47  
48 127 **Themes**

49  
50 128 Across all five focus groups,<sup>\*</sup> three major themes emerged about how participants wanted to be  
51  
52 129 engaged by PHRs: they wanted (1) novel content that was relevant to their immediate and ongoing care,

53  
54  
55 <sup>o</sup> The following is used for the verbal annotation of participant percentages: All=100%, nearly all=80-99%, most=60-80%, many=40-60%, a majority= >50%, some=25-40%, few=<25%.

130 (2) a PHR they could trust for accuracy, security, and privacy, and (3) a highly functional PHR, facilitating  
 131 care and communication with their clinician, and providing access to comprehensive personalized  
 132 information shared with the clinician. Although practical usefulness was said to be essential, a major  
 133 reason why participants said they trusted, used, and sought relevance in the IPHR was that it was  
 134 offered to them by their personal clinician.

#### 135 Relevance

136 A few participants noted that upcoming appointments with their clinician made IPHR use more  
 137 compelling, contributed to their registering, and led them to notice the content pertinent to that visit.  
 138 Most, however, reported that the invitation for the IPHR was received at a time unassociated with an  
 139 office visit or any specific healthcare needs. Indeed many participants reported that as a result they did  
 140 not feel a pressing need to immediately register for and use the IPHR (Table 2). A few non-users  
 141 declared that they just had not gotten around to registering. Many participants in both the non-user and  
 142 user groups voiced the opinion that they could access similar information on the internet, and that they  
 143 did not recognize that IPHR content was personalized to their needs. Some users commented that they  
 144 had already fully addressed their preventive healthcare needs with their clinician.

145 **TABLE 2: REPRESENTATIVE PARTICIPANT COMMENTS ON RELEVANCE OF THE IPHR**  
 146 **(WHY THEY DIDN'T FEEL A NEED TO REGISTER)**

| Sub-themes                       | Representative Quotations                                                                                                                                                                                                                                                                                                                          |
|----------------------------------|----------------------------------------------------------------------------------------------------------------------------------------------------------------------------------------------------------------------------------------------------------------------------------------------------------------------------------------------------|
| <b>Lacking Urgency</b>           | <p><i>It was procrastination. It wasn't that I wasn't going to do it.</i></p> <p><i>I said, "Boy, this would be -- this is interesting, I should try it." Stuck it in a pile and forgot about it.</i></p>                                                                                                                                          |
| <b>Lacking Novelty</b>           | <p><i>Particularly when it concerns a medical something, I usually look it up, you know, any of the various websites that you can go to.</i></p> <p><i>I am the health related expert in the house. And I have to know what everything is. So yes I go to the Cleveland Clinic and the Mayo Clinic and Johns Hopkins.</i></p>                      |
| <b>Redundant to current care</b> | <p><i>It was not, in my case not new information since my doctor and I had talked about it so much...</i></p> <p><i>She knows what I do for exercise, and she asks me questions when I go in, you know. But, if I didn't have that kind of relationship, then I think I would -- I mean, right now, I don't see, for me, that I need this.</i></p> |

147

148 Trust

---

\* Unless otherwise indicated, findings described herein are from both user and non-user groups.

1  
2  
3 149 Nearly all participants vigorously discussed three components of trust necessary for them to use a PHR:  
4  
5 150 security (protecting their health information), privacy (not sharing their health information with others),  
6  
7 151 and accuracy (ensuring that the clinical content and health recommendations proffered by the system  
8  
9 152 were correct and appropriate for them) (Table 3). Most participants reported trusting the IPHR because  
10  
11 153 it was recommended and used by their clinician's practice. A few participants in the non-user groups  
12  
13 154 indicated discomfort with having any of their personal health information on the Internet. However,  
14  
15 155 most participants in all groups expressed the view that clinician endorsement of the IPHR was an  
16  
17 156 indication that their personal health data were secure. Most participants also expressed strong  
18  
19 157 opposition to PHRs developed by commercial entities and to sharing their health information with their  
20  
21 158 insurance company due to the risk of future denial of coverage.

22  
23  
24  
25  
26  
27  
28  
29  
30  
31  
32  
33  
34  
35  
36  
37  
38  
39  
40  
41  
42  
43  
44  
45  
46  
47  
48  
49  
50  
51  
52  
53  
54  
55  
56  
57  
58  
59  
60

**TABLE 3: REPRESENTATIVE PARTICIPANT COMMENTS ON TRUST OF AN IPHR**

| Sub-themes      | Representative Quotations                                                                                                                                                                                                                                                                                                                                                                                                                                                                                                                                                                                                                                                                                                  |
|-----------------|----------------------------------------------------------------------------------------------------------------------------------------------------------------------------------------------------------------------------------------------------------------------------------------------------------------------------------------------------------------------------------------------------------------------------------------------------------------------------------------------------------------------------------------------------------------------------------------------------------------------------------------------------------------------------------------------------------------------------|
| <b>Security</b> | <p><i>It (IPHR) came through our own doctor; I didn't have any problem with it. If it had just been out of the blue I might have.</i></p> <p><i>At first I was curious as to what is this (IPHR), but then I guess I trusted it because it was [clinician's office] which I trusted.</i></p> <p><i>I've come to trust him to keep my information in his laptop...you have to trust the doctor.</i></p>                                                                                                                                                                                                                                                                                                                     |
| <b>Privacy</b>  | <p><i>I think personally I would only trust what I was affiliated with. What should be familiar with me. I mean, Google certainly doesn't know me...</i></p> <p><i>Another Participant: Oh, Yes they do.</i></p> <p><i>The information you have on the system, passing data maybe to insurance companies and then turn around later and say no we're not going to insure you...</i></p> <p><i>I got scared...because I got the impression that I was going to discuss things of my personal nature with my doctor on the website and I didn't like that, and so I discarded it because I'd rather talk about my health face to face with my doctor.</i></p>                                                                |
| <b>Accuracy</b> | <p><i>There's so many sites out there that you wonder how valid. I felt good that [the clinician's office was] endorsing or leading me to a particular site that they must feel confident in the information and the content..</i></p> <p><i>One reason I don't do (Internet health information) a whole lot is because you get conflicting views and I don't know who to believe and who not to believe. So I...ask my doctor.</i></p> <p><i>I was getting emotionally distraught over those things that I was reading (on the Internet) and then, come to find out, I didn't even have to be concerned about it. But... I got to leave those kinds of things to the doctor because that's what he's trained for.</i></p> |

1  
2  
3 161 Nearly all participants reported having had difficulties distinguishing between accurate and inaccurate  
4  
5 162 health information on the internet (Table 3). A few participants gave examples of erroneous health  
6  
7 163 information that caused anxiety or led to poor personal health choices. Most participants stated that  
8  
9 164 they asked their clinician to verify information they found on the web. Nearly all participants reported  
10  
11 165 that they would trust the accuracy of the content and recommendations made by the IPHR because it  
12  
13 166 was endorsed and used by their clinician, and identified their clinician as their primary authority on the  
14  
15 167 accuracy and application of healthcare information.

168

169 Functionality

170 Functions that the participants identified as important involved two subthemes: enhanced patient-  
171 clinician communication and patient-centered utility (Table 4).

172 **TABLE 4: REPRESENTATIVE PARTICIPANT COMMENTS ON FUNCTIONALITY**173 **Enhanced Patient-Clinician Communication From Using an IPHR**

| Sub-themes                      | Representative Quotations                                                                                                                                                                                                                                                                                                                                                                                                                                                                                                                                                                                                                        |
|---------------------------------|--------------------------------------------------------------------------------------------------------------------------------------------------------------------------------------------------------------------------------------------------------------------------------------------------------------------------------------------------------------------------------------------------------------------------------------------------------------------------------------------------------------------------------------------------------------------------------------------------------------------------------------------------|
| <b>Interactive</b>              | <p><i>Direct communications between the doctor and the patient that you can access via the Internet just like medical records, you should be able to access that.</i></p> <p><i>(As a result of using the IPHR) The nurse called me up and said we haven't seen you in so long, you know, and she starts going through this (prevention) stuff...I said well I've been going to my heart doctor...and she said, you should come back you know.</i></p> <p><i>Not dictating, but cooperating, supportive, and provide me the source of the information, let me go there and look at the thing (IPHR) before, you know we make a decision.</i></p> |
| <b>Focus Discussion</b>         | <p><i>I have 15 minutes to talk to him. And this gives me the ability to list everything that's wrong with me...This is what you need to talk to the doctor about in your physical.</i></p> <p><i>I would think anything that would focus my discussion would hopefully focus his as well.</i></p> <p><i>When I go in to the primary care physician, I don't want to just listen to him. I do want to hear what he has to say, but I want to be able to ask what I think are intelligent questions. I'll go do research on that. And then I feel like I can have a better, more productive discussion with the physician.</i></p>                |
| <b>Broaden Discussion</b>       | <p><i>What if your doctor disagrees somewhat with the United States Preventive Services Task Force? (as recommended by the IPHR)...It becomes a discussion point.</i></p> <p><i>I think it (conversation with clinician) might be a little bit broader (from using the IPHR). You go and say, "Here's what I'm seeing or here's what going on with my family."</i></p>                                                                                                                                                                                                                                                                           |
| <b>Efficiency Pros and Cons</b> | <p><i>There might be an opportunity to take some of the minor issues off the table (after using the PHR), so when you go to the doctor it would shorten the amount of things that you would like to talk to him about because you've answered some of that already.</i></p> <p><i>That email to the doctor, I think, could create a problem. It's very time consuming. You spend all day on the internet answering mail, the doctor will never get paid...SECOND PARTICIPANT: You'd never</i></p>                                                                                                                                                |

10

|  |                                                                                                                                                                                                                   |
|--|-------------------------------------------------------------------------------------------------------------------------------------------------------------------------------------------------------------------|
|  | <p>get your tetanus shot. FIRST PARTICIPANT: ..You'd never get anything else.</p> <p>So what is this doing for the physician? I mean, we're keeping healthier, but it means a lot more work for him in a way.</p> |
|--|-------------------------------------------------------------------------------------------------------------------------------------------------------------------------------------------------------------------|

174

175 **PATIENT-CENTERED IPHR UTILITY**

| Subthemes                                                    | Representative Quotations                                                                                                                                                                                                                                                                                                                                                                                                                                                                                                                                                                                                                                                                                                                                                                                                                                                                                                                                                                                                          |
|--------------------------------------------------------------|------------------------------------------------------------------------------------------------------------------------------------------------------------------------------------------------------------------------------------------------------------------------------------------------------------------------------------------------------------------------------------------------------------------------------------------------------------------------------------------------------------------------------------------------------------------------------------------------------------------------------------------------------------------------------------------------------------------------------------------------------------------------------------------------------------------------------------------------------------------------------------------------------------------------------------------------------------------------------------------------------------------------------------|
| <p><b>Expand Access To Personal Clinical Information</b></p> | <p><i>It's not just security, but also access. My access to my personal information. I want to have that, and electronic medical records, Internet-based systems can provide me with that.. I trust my physician here because I've developed a relationship with him, but anybody else, I would want to have absolute access to my information.</i></p>                                                                                                                                                                                                                                                                                                                                                                                                                                                                                                                                                                                                                                                                            |
| <p><b>Align Patient-Clinician Information</b></p>            | <p><i>Knowing that all the information is correct to the best of your knowledge, and in one place where it can be accessed by the doctor and by you, it makes me feel very secure.</i></p> <p><i>This information is shared with your physician -- as you update things your provider is going to be made aware of this you know-We need to be on the same page.</i></p>                                                                                                                                                                                                                                                                                                                                                                                                                                                                                                                                                                                                                                                           |
| <p><b>Provide Personalized Information</b></p>               | <p><i>I think with that information available (in the IPHR), I think it will actually help him a great deal to change my lifestyle. I think that's what all this preventive medicine is all about is how you change your lifestyle.</i></p> <p><i>It also gave me some thoughts about the preventive things I should need to know or that I should be thinking about. So it made me think about, gosh I'll have to ask her. For example, something about an aspirin a day, is it something that's appropriate for me?</i></p> <p><i>There was lots of information there but it was not, in my case not new information since my doctor and I had talked about it so much...</i></p>                                                                                                                                                                                                                                                                                                                                                |
| <p><b>Comprehensively Address Patient Needs</b></p>          | <p><i>I'm surprised that this isn't something for medications. One doctor says you got to take calcium and another one says you got to take multivitamin and another one says you got to take an aspirin, and people may be taking allergy medicines that they get over the counter...</i></p> <p><i>Some general thing about menopause or some of the women's issues would have been helpful. Age specific things might be helpful, children, you know, developmental or something like that just as a good reference for parents.</i></p> <p><i>Say you had in your history that you had a history of stroke or cancer, would it also give patient education stuff, like here's a link to the American Cancer Society? Or here's a thing for support group information? I'm a surviving cancer patient...</i></p> <p><i>Here's what we want: we're living here but we want to occasionally go somewhere else. Anyone in the country should be able to open and keep track of it accurately...realistically and securely.</i></p> |

176

177 Many participants stated that they wanted PHRs to enhance communication with their clinician **both**  
 178 **electronically and in person**. Several liked being contacted about preventive care after they used the  
 179 IPHR. Participants described how the IPHR could focus discussions during office visits, making their visits  
 180 more productive. Conversely, several also mentioned that the IPHR could appropriately broaden

11



1  
2  
3 181 discussions for some topics, such as identifying preventive screening choices that they or their clinician  
4  
5 182 viewed as warranting dialogue, or starting conversations about lifestyle changes. However, some  
6  
7 183 participants expressed concern that more time would be required for busy clinicians and patients to use  
8  
9 184 the IPHR or similar tools. Participants worried about increased fees for either patients or practices to  
10  
11 185 use similar PHRs in the future.

12 186  
13  
14 187 Many participants said that a critically important feature of the IPHR was the ability for patients to  
15  
16 188 access their personal health information. They explained that this access was important so that they  
17  
18 189 could be “on the same page” as their clinician. They also commented that shared access to information  
19  
20 190 would contribute to improved accuracy of records and more productive interactions.

21 191  
22 192 Many participants identified the personalized advice offered by the IPHR, its prompts to discuss its  
23  
24 193 recommendations with the clinician (e.g. whether to take aspirin), and its ability to prioritize  
25  
26 194 recommendations and thereby highlight critical or information to act on, as very important. Also of  
27  
28 195 interest to many (but not available in this IPHR) were adding features for comprehensive medication  
29  
30 196 reconciliation, in-depth information for the whole family for prevention as well as for specific diseases,  
31  
32 197 and links to local resources that provide support and information for lifestyle changes, preventive care  
33  
34 198 needs, and chronic diseases. Moreover, several participants stated that PHRs, such as the IPHR, should  
35  
36 199 be shared seamlessly across all healthcare providers and settings.

37 200

## 38 201 **DISCUSSION**

39 202 Given the national investment of \$27 billion to promote the adoption, implementation, and meaningful  
40  
41 203 use of health information technology,<sup>45-47</sup> it is essential to understand how to better engage patients in  
42  
43 204 using technology if it is to achieve its full potential. Many Americans have not embraced the use of  
44  
45 205 PHRs,<sup>48</sup> but our findings underscore the general interest of patients in using such tools if certain  
46  
47 206 attributes are offered.

48 207

49  
50 208 When PHR use is integrated into care so that it improves the efficiency and quality of patients’ care (e.g.  
51  
52 209 timely use related to clinician visits), its relevance becomes more transparent. The PHR becomes a  
53  
54 210 welcome extension of interactions with the clinician and the related healthcare team.

55 211



1  
2  
3 212 National surveys have clearly documented a level of public concern about personal health information  
4  
5 213 existing on the web and about employers, insurers, or even commercial entities being able to access or  
6  
7 214 misuse such information.<sup>48</sup> Although one could argue that such fears may ease over time as more  
8  
9 215 private information migrates into the cyber-environment, this reticence may have already contributed  
10  
11 216 to the failure of some commercial PHRs to gain wide acceptance by the general public.<sup>49</sup>  
12  
13

14 218 The addition of certain PHR features that seem popular with patients, such as displaying test results or  
15  
16 219 supporting asynchronous communication via secure messaging, has generated only modest increases in  
17  
18 220 actual PHR utilization.<sup>17,21</sup> One explanation is that patients who are accustomed to more powerful  
19  
20 221 information tools in other aspects of life may expect greater functionality than merely seeing their  
21  
22 222 information.<sup>50,51</sup> Indeed, participants in this study wanted much more – including links to personalized  
23  
24 223 recommendations, and resources and tools to help make information actionable to improve health, as  
25  
26 224 provided by this IPHR.  
27

28 226 Across both users and non-users, nearly all participants reported being more likely to perceive a PHR as  
29  
30 227 relevant, trustworthy, and functional if it was offered to them by their personal clinician. We conclude  
31  
32 228 that a key element of engaging patients to use a PHR extends beyond the tool's design and includes how  
33  
34 229 it is presented to patients and integrated into their care experience (Figure 1).  
35

36 231 Although some PHR evaluations seem to show enhanced patient uptake when patients had a *lack* of  
37  
38 232 trust in their clinician,<sup>52,53</sup> other information seems to indicate that encouragement of PHR uptake by a  
39  
40 233 patient's clinician has a positive influence on patient use and that patient and clinician PHR use  
41  
42 234 enhances their relationship.<sup>54</sup> Our findings support Nazi's findings<sup>54</sup> and extend them to show, as in  
43  
44 235 Figure 1, that the patient-clinician relationship explicitly supports all critical components of patient  
45  
46 236 engagement in IPHRs.  
47

48 238 Other models, among them DeLone and McLean's MISS<sup>26</sup> (Figure 2), have been applied to clinical  
49  
50 239 information systems, including PHRs. Booth states that MISS lacks sensitivities to medical and  
51  
52 240 relationship-laden milieus of technology (previously described by Sandelowski),<sup>29,55</sup> whereas Figure 1  
53  
54 241 and our results demonstrate both clinical as well as personal contexts for patients and clinicians.  
55  
56  
57  
58  
59  
60

242 Further, although Archer and colleagues used MISS to categorize aspects of their scoping review of  
 243 PHRs,<sup>23</sup> they only examined selected parts of the model.

244  
 245 Differences between Figure 1 and MISS aside, we wish to point out several similarities as well, including  
 246 the previously mentioned use of causal and process elements, and the feedback loop from 'Net Benefits'  
 247 to both 'Use' and 'User Satisfaction'.

249 **FIGURE 1: PERSONAL HEALTH RECORD (PHR) FEATURES NEEDED TO ENGAGE**  
 250 **PATIENTS**

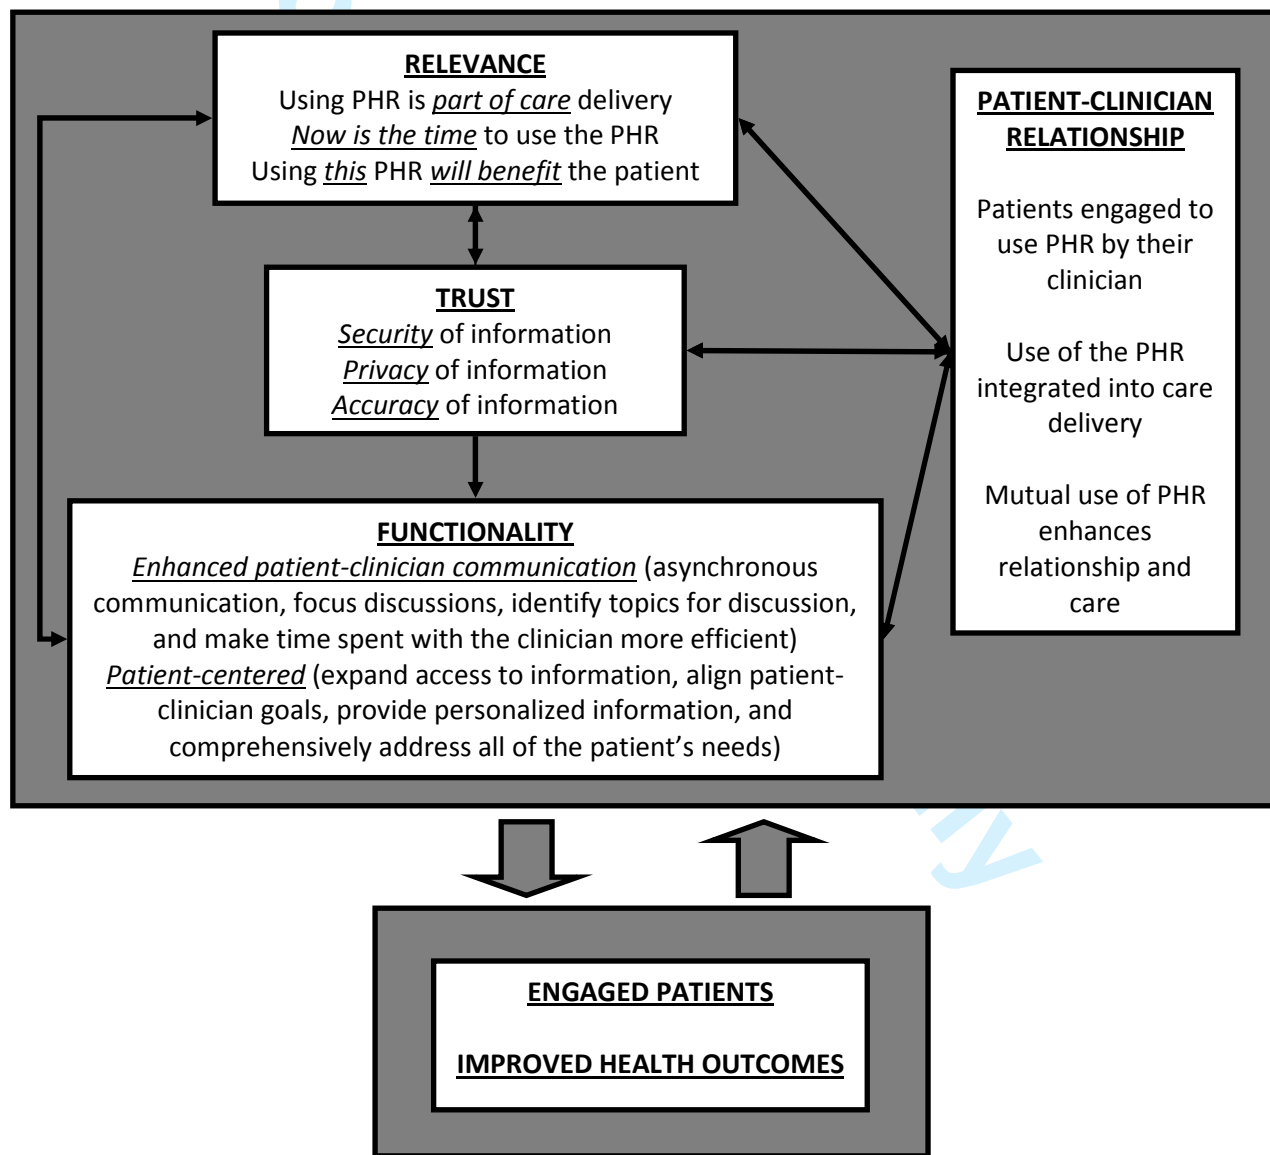

251

1  
2  
3  
4  
5  
6  
7  
8  
9  
10  
11  
12  
13  
14  
15  
16  
17  
18  
19  
20  
21  
22  
23  
24  
25  
26  
27  
28  
29  
30  
31  
32  
33  
34  
35  
36  
37  
38  
39  
40  
41  
42  
43  
44  
45  
46  
47  
48  
49  
50  
51  
52  
53  
54  
55  
56  
57  
58  
59  
60

252  
253

For peer review only

FIGURE 2: DELONE AND MCLEAN'S MODEL OF INFORMATION SYSTEM SUCCESS<sup>26</sup>



Our study has several important limitations. First, while we attempted to assemble focus groups with a representative range of ages and genders, we may have introduced a selection bias in our sample. Participants were older, more likely to be female, mostly white, and more educated than the overall user and non-user populations.<sup>56,57</sup> However, women are more likely than men to use PHRs<sup>58</sup> and to make healthcare decisions for families.<sup>58-60</sup> Other studies indicate that members of different socioeconomic and racial-ethnic groups may have different PHR preferences (e.g. a PHR not based on the Internet) and may require assistance in using a PHR.<sup>61-63</sup> Second, the sample was drawn entirely from eight practices in northern Virginia. Other locales may have different PHR needs requiring different strategies to engage patients in PHR use. Third, all participants were recruited from family medicine offices that already offered a PHR to patients, and most participants had established relationships with their clinician. Accordingly, participants may have emphasized the value of the patient-clinician relationship in PHR use more than populations from other settings. Lastly, whereas the number of participants (28) will not quantitatively generalize to all IPHR users, the nature of qualitative research is often that of looking at specific cases, many times in order to inform the gaps generated by other data, rather than to compete with or duplicate that information.<sup>42</sup>

## CONCLUSION:

1  
2  
3 282 To engage primary care patients with an IPHR, this study identifies the importance of relevance, trust  
4  
5 283 and functionality, all integrated with office processes and the patient-clinician relationship. In addition  
6  
7 284 to suggesting possible modifications to established models of technological acceptance, these findings  
8  
9 285 have relevance for healthcare providers, the information technology industry, and policymakers who  
10  
11 286 share an interest in encouraging patients to use personal health records or other information tools.  
12  
13 287 Studies like ours should be expanded and replicated in other settings to more fully understand how to  
14  
15 288 make such technology more useful to patients.  
16

289

17 290 **Acknowledgments:** The authors thank the participating study practices: Fairfax Family Practice,  
18 291 Gainesville Family Medicine, Herndon Family Medicine, Lorton Station Family Medicine, Prince William  
19 292 Family Medicine, South Riding Family Medicine, Town Center Family Medicine, and Vienna Family  
20 293 Medicine. We received invaluable advice and assistance with the focus groups from Christine C. Kerns,  
21 294 RN, and in designing the project from Stephen F. Rothemich MD, MS. as well as Kristin Schmidt in  
22 295 project assistance.

23 296 **Conflicts of interest:** Virginia Commonwealth University holds the intellectual property rights to the  
24 297 interactive preventive care record evaluated in this study. Although the university and developers are  
25 298 entitled to the system's revenue, MyPreventiveCare is a noncommercial product, and no revenues have  
26 299 been generated other than grant funding.  
27  
28  
29  
30  
31  
32  
33  
34  
35  
36  
37  
38  
39  
40  
41  
42  
43  
44  
45  
46  
47  
48  
49  
50  
51  
52  
53  
54  
55  
56  
57  
58  
59  
60

## REFERENCES

1. Stewart M, Brown JB, Weston WW, McWhinney IR, McWilliam CL, Freeman TR. *Patient-Centered Medicine: Transforming the Clinical Method*. Thousand Oaks, CA: Sage Publications, Inc.; 1995.
2. Stewart M. Towards a global definition of patient centred care. *Bmj*. Feb 24 2001;322(7284):444-445.
3. Greenfield S, Kaplan S, Ware JE Jr. Expanding patient involvement in care. Effects on patient outcomes. *Ann Intern Med* 1985;102(4): 520-8.
4. Kaplan SH, Greenfield S, Ware JE Jr. Assessing the effects of physician-patient interactions on the outcomes of chronic disease. *Med Care* 1989; 27(3):S110-S127.
5. Joint Principles of the Patient-Centered Medical Home. *American Academy of Family Physicians, American Academy of Pediatricians, American Osteopathic Association*. Available at: <http://www.pcpcc.net/>. Accessed Oct, 2011.
6. NCQA - Measuring Quality. Improving Health Care. *National Committee for Quality Assurance*. Available at: <http://www.ncqa.org>. Accessed October, 2011.
7. The Patient Protection and Affordable Care Act. Section 4103. *Public Law 111-148*. 2nd Session ed; 2010.
8. Bielaszka-DuVernay C, Soll RF, Kantak AD, et al. Vermont's Blueprint for medical homes, community health teams, and better health at lower cost Evaluating the medical evidence for quality improvement Management of high-order multiple births: application of lessons learned because of participation in Vermont Oxford Network collaboratives. *Health Aff (Millwood)*. Mar Nov 2006;30(3):383-386.
9. Blumenthal D, Tavenner M. The "meaningful use" regulation for electronic health records. *N Engl J Med*. Aug 5 2010;363(6):501-504.
10. Health IT. *The Office of the National Coordinator for Health Information Technology*. U.S. Department of Health & Human Services. Available at: <http://healthit.hhs.gov>. Accessed July, 2011.
11. Hing E, Burt CW. Office-based medical practices: methods and estimates from the national ambulatory medical care survey. *Adv Data*. Mar 12 2007(383):1-15.
12. Krist AH, Woolf SH. A vision for patient-centered health information systems. *JAMA*. 2011;305(3):300-301.
13. Wang CJ, Huang JT. Integrating technology into healthcare: what will it take? *JAMA* 2012; 307(6): 569-570.
14. Petersen H. A (very) popular health record. Available at: [http://xnet.kp.org/newscenter/pressreleases/nat/2012/080612\\_4\\_million\\_phr\\_registered\\_users.html](http://xnet.kp.org/newscenter/pressreleases/nat/2012/080612_4_million_phr_registered_users.html) Accessed May, 2013.
15. Poorsina R, Wardell A. Four million people choose connectivity and convenience with Kaiser Permanente's personal health record. Available at: <http://www.va.gov/health/NewsFeatures/2013/March/A-Very-Popular-Personal-Health-Record.asp> Accessed May, 2013.
16. Internet usage over time. *Pew Internet and American Life*. Available at: <http://www.pewinternet.org/>. Accessed Oct, 2011.
17. Silvestre AL, Sue VM, Allen JY. If you build it, will they come? The Kaiser Permanente model of online health care. *Health Aff (Millwood)*. Mar-Apr 2009;28(2):334-344.

18

- 1
  - 2
  - 3
  - 4
  - 5
  - 6
  - 7
  - 8
  - 9
  - 10
  - 11
  - 12
  - 13
  - 14
  - 15
  - 16
  - 17
  - 18
  - 19
  - 20
  - 21
  - 22
  - 23
  - 24
  - 25
  - 26
  - 27
  - 28
  - 29
  - 30
  - 31
  - 32
  - 33
  - 34
  - 35
  - 36
  - 37
  - 38
  - 39
  - 40
  - 41
  - 42
  - 43
  - 44
  - 45
  - 46
  - 47
  - 48
  - 49
  - 50
  - 51
  - 52
  - 53
  - 54
  - 55
  - 56
  - 57
  - 58
  - 59
  - 60
18. Ralston JD, Coleman K, Reid RJ, Handley MR, Larson EB. Patient experience should be part of meaningful-use criteria. *Health Aff (Millwood)*. Apr 2010;29(4):607-613.
19. Tang PC, Lee TH. Your doctor's office or the Internet? Two paths to personal health records. *N Engl J Med*. Mar 26 2009;360(13):1276-1278.
20. CAHPS Clinician & Group Survey. *Agency for Healthcare Research and Quality*. Available at: [https://www.cahps.ahrq.gov/content/products/CG/PROD\\_CG\\_CG40Products.asp?p=1021&s=213](https://www.cahps.ahrq.gov/content/products/CG/PROD_CG_CG40Products.asp?p=1021&s=213). Accessed Sept, 2011.
21. Dickinson WP, et. al. Use of a Website to Accomplish Health Behavior Change: If You Build It, Will They Come? And Will It Work If They Do? *J Am Board Fam Med* 2013;26:168–176.
22. Wen KY, Kreps G, Zhu F, Miller S. Consumers' perceptions about and use of the internet for personal health records and health information exchange: analysis of the 2007 Health Information National Trends Survey. *J Med Internet Res*. 2010 Dec 18;12(4):e73.
23. Archer N, Fevrier-Thomas U, Lokker C, McKibbin KA, Straus SE. Personal health records: a scoping review. *J Am Med Assoc* 2011;18:515e522.
24. Forsythe DE. New bottles, old wine. Hidden cultural assumptions in a computerized explanation system for migraine sufferers. *Med Anthro Quart* 1996;10:551-74.
25. McKnight DH, Carter M, Thatcher JB, and Clay PF. Trust in a Specific Technology: An Investigation of its Components and Measures. *ACM Transactions on Management Information Systems*. 2011; 2(2): 1-15.
26. DeLone WH and McLean ER. The DeLone and McLean Model of Information Systems Success: A Ten-Year Update. *J Management Information Systems* 2003;19:9-30.
27. Davis FD. Perceived usefulness, perceived ease of use, and user acceptance of information technology. *MIS Q* 1989;13:319–39.
28. Moores TT. Towards an integrated model of IT acceptance in healthcare. *Decision Support Systems* 53 (2012) 507–516.
29. Booth RG. Examining the functionality of the DeLone and McLean information system success model as a framework for synthesis in nursing information and communication technology research. *CIN* 2012; 30; 330-345.
30. Designing a patient-centered personal health record to promote preventive care. *BMC Med Inform Decis Mak*. 2011;11:73.
31. Krist AH, Woolf SH, Rothemich SF, Johnson RE, Peele JE, Cunningham TD, Longo DR, Bello GA, Matzke GR. Interactive preventive health record to enhance delivery of recommended care: a randomized trial. *Ann Fam Med*. Jul 2012;10:312-319.
32. Department of Family Medicine. Virginia Commonwealth University. A How-To Guide for Using Patient-Centered Personal Health Records to Promote Prevention. 2012; <http://healthit.ahrq.gov/KRIST-IPHR-Guide-0612.pdf> Accessed June, 2012.
33. Complete Report: the Seventh Report of the Joint National Committee of Prevention, Detection, Evaluation, and Treatment of High Blood Pressure. Vol NIH Pub. No. 04-5239. Bethesda, MD: National Heart, Lung, and Blood Institute; 2004.
34. Chobanian AV, Bakris GL, Black HR, et al. The Seventh Report of the Joint National Committee on Prevention, Detection, Evaluation, and Treatment of High Blood Pressure: the JNC 7 report. *Jama*. May 21 2003;289(19):2560-2572.

- 1  
2  
3  
4  
5  
6  
7  
8  
9  
10  
11  
12  
13  
14  
15  
16  
17  
18  
19  
20  
21  
22  
23  
24  
25  
26  
27  
28  
29  
30  
31  
32  
33  
34  
35  
36  
37  
38  
39  
40  
41  
42  
43  
44  
45  
46  
47  
48  
49  
50  
51  
52  
53  
54  
55  
56  
57  
58  
59  
60
35. Grundy SM, Cleeman JI, Merz CN, et al. Implications of recent clinical trials for the National Cholesterol Education Program Adult Treatment Panel III guidelines. *Circulation*. Jul 13 2004;110(2):227-239.
  36. National Cholesterol Education Program. Third report of the expert panel on detection, evaluation, and treatment of high blood cholesterol in adults. Vol NIH Pub. No. 02-5215. Bethesda, MD: National Heart, Lung, and Blood Institute; 2002.
  37. American Diabetes Association (ADA). Standards of medical care in diabetes. II. Testing for pre-diabetes and diabetes in asymptomatic patients. *Diabetes care*. Jan 2008;31(Suppl 1):S13-14.
  38. Recommendation and Guidelines: Advisory Committee on Immunization Practices (ACIP). *Department of Health and Human Services. Centers for Disease Control and Prevention*. Available at: <http://www.cdc.gov/vaccines/recs/ACIP/default.htm>. Accessed January, 2010.
  39. U.S. Department of Health and Human Services. Healthy People 2010: Understanding and Improving Health. 2nd ed. Washington, D.C.: Government Printing Office; November 2000.
  40. Dietary Guidelines for Americans 2005. *Department of Health and Human Services and the Department of Agriculture*. Available at: <http://www.healthierus.gov/dietaryguidelines/>. Accessed July, 2011.
  41. Kuzel AJ. Sampling in Qualitative Inquiry. In Crabtree BF, Miller WL. *Doing Qualitative Research*. 2 ed. California: Sage Oaks; 1999, p 34.
  42. Crabtree BF, Miller WL. *Doing Qualitative Research*. 2 ed. California: Sage Oaks; 1999.
  43. McNamara C. Basics of Conducting Focus Groups. Available at: <http://managementhelp.org/businessresearch/focus-groups.htm>. Accessed Oct, 2011.
  44. Kuzel AJ. *ibid*. p 42.
  45. Blumenthal D, Tavenner M. The "meaningful use" regulation for electronic health records. *N Engl J Med*. Aug 5 2010;363(6):501-504.
  46. The American Recovery and Reinvestment Act of 2009. Available at: <http://thomas.loc.gov/cgi-bin/query/z?c111:H.R.1>. Accessed June, 2012.
  47. Ackerman K. Heavy hitters hit HIMSS stages to stump for health IT *iHealthBeat*. Available at: <http://www.ihealthbeat.org/features/2011/heavy-hitters-hit-himss-stages-to-stump-for-health-it.aspx>. Accessed June, 2012.
  48. Connecting for Health. Americans Overwhelmingly Believe Electronic Personal Health Records Could Improve Their Health. *Markle Foundation; June 2008*. Available at: <http://www.connectingforhealth.org/resources/ResearchBrief-200806.pdf>. Accessed June, 2012.
  49. An Update on Google Health, *Google, Official Blog, June 24 2011 at 2:02PM*. Available at: <http://googleblog.blogspot.com/2011/06/update-on-google-health-and-google.html#!/2011/06/update-on-google-health-and-google.html> Accessed June, 2012.
  50. Wakefield SW, Kruse RL, Wakefield BJ, Koopman RJ, Keplinger LE, Canfield SM, Mehr DR. Consistency of patient preferences about a secure Internet-based patient communications portal: contemplating, enrolling, and using. *Am J Med Qual* 2012; published online April 18, 2012.



- 1  
2  
3 300 51. Weitzman ER, Kaci L, Mandl KD. Acceptability of a Personally Controlled Health Record in a  
4 301 Community-Based Setting: Implications for Policy and Design. *J Med Internet Res* 2009; 11: e14.  
5 302 52. Fisher B, Bhavnani V, and Winfield M. How patients use access to their full health records: a  
6 303 qualitative study of patients in general practice *J R Soc Med* 2009 102: 539-44.  
7 304 53. Wibe T, Hellesø R, Slaughter L, Ekstedt M. Lay people's experiences with reading their medical  
8 305 record. *Social Science & Medicine* 2011: 72; 1570-1573.  
9 306 54. Nazi KM. The personal health record paradox: health care professionals' perspectives and the  
10 307 information ecology of personal health record systems in organizational and clinical settings. *J*  
11 308 *Med Internet Res*. 2013 April; 15(4): e70.  
12 309 55. Sandelowski M. (Ir)Reconcilable differences? the debate concerning nursing and technology. *J*  
13 310 *Nurs Scholarsh*. 1997;29(2):169–174.  
14 311 56. Krist AH, McCormally T. What Patients Want from their Doctor's Website. *Fam Med* 2001;  
15 312 33:552.  
16 313 57. State and County Quick Facts, United states Census Bureau. Available at  
17 314 <http://quickfacts.census.gov/qfd/states/51/51059.html> accessed February 2012.  
18 315 58. Rice RE. Influences, usage, and outcomes of Internet health information searching: multivariate  
19 316 results from the Pew surveys. *International Journal of Medical Informatics* 2006; 75: 8-28.  
20 317 59. Miller EA, West DM. Characteristics Associated With Use of Public and Private Web Sites as  
21 318 Sources of Health Care Information *Results From a National Survey Med Care* 2007;45: 245–251.  
22 319 60. Ybarra ML, Sumanb M. Help seeking behavior and the Internet: A national survey. *International*  
23 320 *Journal of Medical Informatics* 2006; 75: 29-41.  
24 321 61. Yamin CK, *et.al.*. The digital divide in adoption and use of a personal health record. *Arch Intern*  
25 322 *Med*. 2011 Mar 28;171(6):568-74.  
26 323 62. Bagchi A, Moreno L, af Ursin R. Considerations in Designing Personal Health Records for  
27 324 Underserved Populations. Mathematica Policy Research, Inc. April 2007. Available at:  
28 325 <http://www.mathematica-mpr.com/publications/pdfs/hlthcaredisparib1.pdf>. Accessed February  
29 326 2012.  
30 327 63. Moreno L, Peterson S, Bagchi A, and af Ursin R. Personal Health Records: What Do Underserved  
31 328 Consumers Want? Mathematica Policy Research, Inc. May 2007. Available at:  
32 329 <http://www.mathematica-mpr.com/publications/PDFs/phrissuebr.pdf> Accessed February 2012.
